# 1 Transferability of a European-derived Alzheimer's Disease Genetic 2 Risk Score across Multi-Ancestry Populations.

3  
4 Aude Nicolas<sup>1</sup>, Benjamin Grenier-Boley<sup>1</sup>, Richard Sherva<sup>2,3</sup>, Yoontae Kim<sup>4</sup>, Masataka  
5 Kikuchi<sup>5</sup>, Itziar de Rojas<sup>6,7</sup>, Carolina Dalmasso<sup>8,9</sup>, Xiaopu Zhou<sup>10,11,12</sup>, Yann Le Guen<sup>13,14</sup>,  
6 Carlos E Arboleda-Bustos<sup>15</sup>, Maria Aparecida Camargos Bicalho<sup>16,17,18</sup>, Maëlenn Guerchet<sup>19</sup>,  
7 Sven van der Lee<sup>20,21</sup>, Monica Goss<sup>22</sup>, Atahualpa Castillo<sup>23</sup>, Céline Bellenguez<sup>1</sup>, Fahri  
8 Küçükali<sup>24,25</sup>, Claudia Satizabal Barrera<sup>22,26,27</sup>, Bernard Fongang<sup>22,28,29</sup>, Qiong yang<sup>26,27</sup>, Oliver  
9 Peters<sup>30,31</sup>, Anja Schneider<sup>32,33</sup>, Martin Dichgans<sup>34,35,36</sup>, Dan Rujescu<sup>37</sup>, Norbert Scherbaum<sup>38</sup>,  
10 Jürgen Deckert<sup>39</sup>, Steffi Riedel-Heller<sup>40</sup>, Lucrezia Hausner<sup>41</sup>, Laura Molina Porcel<sup>42,43</sup>, Emrah  
11 Düzél<sup>44,45</sup>, Timo Grimmer<sup>46</sup>, Jens Wiltfang<sup>47,48,49</sup>, Stefanie Heilmann-Heimbach<sup>50</sup>, Susanne  
12 Moebus<sup>51</sup>, Thomas Tegos<sup>52</sup>, Nikolaos Scarmeas<sup>53,54</sup>, Oriol Dols-Icardo<sup>55,7</sup>, Fermin  
13 Moreno<sup>56,7,57</sup>, Jordi Pérez-Tur<sup>58,7</sup>, María J. Bullido<sup>59,7,60,61</sup>, Pau Pastor<sup>62,63</sup>, Raquel Sánchez-  
14 Valle<sup>64</sup>, Victoria Álvarez<sup>65,66</sup>, Han Cao<sup>10</sup>, Nancy Y. Ip<sup>10,11,12</sup>, Amy K. Y. Fu<sup>10,11,12</sup>, Fanny C. F.  
15 Ip<sup>11,12</sup>, Natividad Olivar<sup>67</sup>, Carolina Muchnik<sup>67</sup>, Carolina Cuesta<sup>68</sup>, Lorenzo Campanelli<sup>69</sup>,  
16 Patricia Solis<sup>70</sup>, Daniel Gustavo Politis<sup>68</sup>, Silvia Kochen<sup>70</sup>, Luis Ignacio Brusco<sup>67</sup>, Mercè  
17 Boada<sup>71,7</sup>, Pablo García-González<sup>71</sup>, Raquel Puerta<sup>71</sup>, Pablo Mir<sup>72,7</sup>, Luis M Real<sup>73,74,7</sup>, Gerard  
18 Piñol-Ripoll<sup>75,76</sup>, Jose María García-Alberca<sup>77,7</sup>, Jose Luís Royo<sup>78</sup>, Eloy Rodríguez-  
19 Rodríguez<sup>79,7</sup>, Hilkka Soininen<sup>80</sup>, Sami Heikkinen<sup>81</sup>, Alexandre de Mendonça<sup>82</sup>, Shima  
20 Mehrabian<sup>83</sup>, Latchezar Traykov<sup>84</sup>, Jakob Hort<sup>85,86</sup>, Martin Vyhnaek<sup>85,86</sup>, Katrine Laura  
21 Rasmussen<sup>87,88</sup>, Jesper Qvist Thomassen<sup>87</sup>, Yolande A.L. Pijnenburg<sup>20</sup>, Henne Holstege<sup>20,89</sup>,  
22 John van Swieten<sup>90</sup>, Inez Ramakers<sup>91</sup>, Frans Verhey<sup>91</sup>, Aad van der Lugt<sup>92</sup>, Philip  
23 Scheltens<sup>20</sup>, Jenny Ortega-Rojas<sup>15</sup>, Ana Gabriela Concha Mera<sup>15</sup>, Maria F. Mahecha<sup>15</sup>,  
24 Rodrogo Pardo<sup>15</sup>, Gonzalo Arboleda<sup>15</sup>, Caroline Graff<sup>93</sup>, Goran Papenberg<sup>94</sup>, Vilmantas  
25 Giedraitis<sup>95</sup>, Anne Boland<sup>96</sup>, Jean-François Deleuze<sup>96</sup>, Luiz Armando de Marco<sup>97,17</sup>, Edgar  
26 Nunes de Moraes<sup>16,18</sup>, Bernardo de Mattos Viana<sup>98,17,99</sup>, Marco Túlio Gualberto Cintra<sup>16,18</sup>,  
27 Anthony Grsiwold<sup>100</sup>, Tatiana Forund<sup>101</sup>, Carlos Cruchaga<sup>102,103</sup>, Jonathan Haines<sup>104</sup>, Lindsay  
28 Farrer<sup>105,106,107,108,109</sup>, Anita DeStefano<sup>110</sup>, Ellen Wijsman<sup>111,112,113</sup>, Richard Mayeux<sup>114,115</sup>,  
29 Margaret Pericak-Vance<sup>100,116</sup>, Brian Kunkle<sup>100</sup>, Alison Goate<sup>117</sup>, Gerard D. Schellenberg<sup>118</sup>,  
30 Badri Vardarajan<sup>114,115,119</sup>, Li-San Wang<sup>118</sup>, Yuk Yee Leung<sup>118</sup>, Clifton Dalgard<sup>120</sup>, Gael  
31 Nicolas<sup>121</sup>, David Wallon<sup>121</sup>, Carole Dufouil<sup>122,123</sup>, Florence Pasquier<sup>124</sup>, Olivier Hanon<sup>125</sup>,  
32 Stéphanie Debette<sup>126,127</sup>, Edna Grünblatt<sup>128,129,130</sup>, Julius Popp<sup>131,132,133</sup>, Bárbara Angel<sup>134,135</sup>,  
33 Sergio Golger<sup>136,137</sup>, Maria Victoria Chacon<sup>136</sup>, Rafael Aranguiz<sup>136,138</sup>, Paulina Orellana<sup>139,140</sup>,  
34 Andrea Slachevsky<sup>139,141</sup>, Christian Gonzalez-Billault<sup>139</sup>, Cecilia Albala<sup>134,142</sup>, Patricio  
35 Fuentes<sup>143,144</sup>, Tenielle Porter<sup>145,146,147</sup>, Simon M Laws<sup>145,146,147</sup>, Perminder Sachdev<sup>148</sup>, Karen  
36 Mather<sup>148</sup>, Richard L. Hauger<sup>149,150</sup>, Victoria Merritt<sup>151,152,153</sup>, Matthew Panizzon<sup>152,154,153</sup>, Rui  
37 Zhang<sup>2</sup>, Michael Gaziano<sup>155,156</sup>, Roberta Ghidoni<sup>157</sup>, Daniela Galimberti<sup>158,159</sup>, Beatrice  
38 Arosio<sup>160</sup>, Patrizia Mecocci<sup>161,162</sup>, Vincenzo Solfrizzi<sup>163</sup>, Lucilla Parnetti<sup>164</sup>, Alessio  
39 Squassina<sup>165</sup>, Lucio Tremolizzo<sup>166</sup>, Barbara Borroni<sup>167,168</sup>, Benedetta Nacmias<sup>169,170</sup>, Paolo  
40 Caffarra<sup>171</sup>, Davide Seripa<sup>172</sup>, Innocenzo Rainero<sup>173</sup>, Antonio Daniele<sup>174,175</sup>, Fabrizio Piras<sup>176</sup>,  
41 Akinori Miyashita<sup>177</sup>, Norikazu Hara<sup>177</sup>, Kouichi Ozaki<sup>178</sup>, Shumpei Niida<sup>178</sup>, Julie  
42 Williams<sup>179,23</sup>, Carlo Masullo<sup>180</sup>, Philippe Amouyel<sup>180</sup>, Pierre-Marie Preux<sup>19</sup>, Pascal  
43 Mbelesso<sup>19,181</sup>, Bébène Bandzouzi<sup>182</sup>, Andy Saykin<sup>183,101</sup>, Frank Jessen<sup>184,32,185</sup>, Patrick  
44 Kehoe<sup>186</sup>, Cornelia Van Duijn<sup>187,188</sup>, Jungsoo Gim<sup>4</sup>, Nesrine Ben Salem<sup>189</sup>, Ruth Frikke-  
45 Schmidt<sup>87,88</sup>, Lofti Cherni<sup>189,190</sup>, Michael D. Greicius<sup>13</sup>, Magda Tzolaki<sup>52,190</sup>, Pascual Sánchez-  
46 Juan<sup>191,7</sup>, Marco Aurélio Romano Silva<sup>98,17</sup>, Kristel Slegers<sup>24,25</sup>, Martin Ingelsson<sup>192,193,194</sup>,  
47 Jean-François Dartigues<sup>195</sup>, Sudha Seshadri<sup>22,26,27</sup>, Giacomina Rossi<sup>196</sup>, Laura Morelli<sup>69</sup>,  
48 Mikko Hiltunen<sup>81</sup>, Rebecca Sims<sup>23</sup>, Wiesje van der Flier<sup>20</sup>, Ole Andreassen<sup>197,198</sup>, Humberto  
49 Arboleda<sup>15</sup>, Valentina Escott-Price<sup>199,179</sup>, Agustín Ruiz<sup>200,7</sup>, Kun Ho Lee<sup>4</sup>, Takeshi Ikeuchi<sup>177</sup>,  
50 Alfredo Ramirez<sup>8,201,202,32</sup>, Mark Logue<sup>203,204,205,206</sup>, Jean-Charles Lambert<sup>1</sup>

## 51 Correspondence

52 Jean-Charles.lambert@pasteur-lille.fr

53 NOTE: This preprint reports new research that has not been certified by peer review and should not be used to guide clinical practice.

- 55 <sup>1</sup>Univ. Lille, Inserm, CHU Lille, Institut Pasteur de Lille, U1167-RID-AGE facteurs de risque et déterminants  
56 moléculaires des maladies liées au vieillissement, Lille, France
- 57 <sup>2</sup>National Center for PTSD, Behavioral Sciences Division, VA Boston Healthcare System, Boston, MA, USA
- 58 <sup>3</sup>Biomedical genetics/Department of Medicine, Boston University Chobanian & Avedisian School of Medicine,  
59 Boston, MA, USA
- 60 <sup>4</sup>BK FOUR Department of Integrative Biological Sciences, Chosun University, Gwangju, Republic of Korea
- 61 <sup>5</sup>University of Tokyo, Graduate School of Frontier Science, Japan
- 62 <sup>6</sup>Research Center and Memory Clinic, ACE Alzheimer Center Barcelona. Universitat Internacional de Catalunya,  
63 Spain
- 64 <sup>7</sup>CIBERNED, Network Center for Biomedical Research in Neurodegenerative Diseases, National Institute of  
65 Health Carlos III, Madrid, Spain
- 66 <sup>8</sup>Division of Neurogenetics and Molecular Psychiatry, Department of Psychiatry and Psychotherapy, Faculty of  
67 Medicine and University Hospital Cologne, University of Cologne, Cologne, Germany
- 68 <sup>9</sup>Estudios en Neurociencias y Sistemas Complejos (ENyS) CONICET-HEC-UNAJ, Argentina
- 69 <sup>10</sup>Division of Life Science, State Key Laboratory of Molecular Neuroscience, Molecular Neuroscience Center, The  
70 Hong Kong University of Science and Technology, Clear Water Bay, Kowloon, Hong Kong, China
- 71 <sup>11</sup>Hong Kong Center for Neurodegenerative Diseases, Hong Kong Science Park, Hong Kong, China
- 72 <sup>12</sup>Guangdong Provincial Key Laboratory of Brain Science, Disease and Drug Development, HKUST, China  
73 Shenzhen Research Institute, Shenzhen–Hong Kong Institute of Brain Science, Shenzhen, Guangdong 518057  
74 China
- 75 <sup>13</sup>Department of Neurology and Neurological Sciences, Stanford University School of Medicine, Stanford, CA,  
76 USA
- 77 <sup>14</sup>Institut du Cerveau - Paris Brain Institute - ICM, Paris, France
- 78 <sup>15</sup>Neuroscience and Cell Death Research Groups, Medical School and Genetic Institute, Universidad Nacional de  
79 Colombia, Bogota, Colombia
- 80 <sup>16</sup>Department of Clinical Medicine, Federal University of Minas Gerais (UFMG) Belo Horizonte, Minas Geraes,  
81 Brazil
- 82 <sup>17</sup>National Institute of Science and Technology (INCT) Neurotec R, Federal University of Minas Geraes, Belo  
83 Horizonte, Minas Geraes, Brazil
- 84 <sup>18</sup>Geriatrics Service of the University Hospital, Federal University of Minas Gerais, Belo Horizonte, Minas Geraes,  
85 Brazil
- 86 <sup>19</sup>Inserm U1094, IRD UMR270, Univ. Limoges, CHU Limoges, EpiMaCT - Epidemiology of chronic diseases in  
87 tropical zone, Institute of Epidemiology and Tropical Neurology, Omega Health, Limoges, France
- 88 <sup>20</sup>Alzheimer Center Amsterdam, Department of Neurology, Amsterdam Neuroscience, Vrije Universiteit  
89 Amsterdam, Amsterdam UMC, Amsterdam, The Netherlands
- 90 <sup>21</sup>Department of Complex Trait Genetics, Center for Neurogenomics and Cognitive Research, Amsterdam  
91 Neuroscience, Vrije University, Amsterdam, The Netherlands.
- 92 <sup>22</sup>Glenn Biggs Institute for Alzheimer's and Neurodegenerative Diseases, San Antonio, TX, USA
- 93 <sup>23</sup>Division of Psychological Medicine and Clinical Neuroscience, School of Medicine, Cardiff University, Wales, UK
- 94 <sup>24</sup>Complex Genetics of Alzheimer's Disease Group, VIB Center for Molecular Neurology, VIB, Antwerp, Belgium
- 95 <sup>25</sup>Department of Biomedical Sciences, University of Antwerp, Antwerp, Belgium
- 96 <sup>26</sup>Boston University and the NHLBI's Framingham Heart Study, Boston, MA, USA
- 97 <sup>27</sup>Department of Neurology, Boston University School of Medicine, Boston, MA, USA
- 98 <sup>28</sup>Department of Biochemistry and Structural Biology, University of Texas Health Science Center, San Antonio,  
99 TX, USA
- 100 <sup>29</sup>Department of Population Health Sciences, University of Texas Health Science Center, San Antonio, TX, USA
- 101 <sup>30</sup>German Center for Neurodegenerative Diseases (DZNE), Berlin, Germany
- 102 <sup>31</sup>Charité – Universitätsmedizin Berlin, corporate member of Freie Universität Berlin, Humboldt-Universität zu  
103 Berlin, and Berlin Institute of Health, Institute of Psychiatry and Psychotherapy, Berlin, Germany
- 104 <sup>32</sup>German Center for Neurodegenerative Diseases (DZNE), Bonn, Germany
- 105 <sup>33</sup>Department for Neurodegenerative Diseases and Geriatric Psychiatry, University Hospital Bonn, Venusberg-  
106 Campus 1, 53127 Bonn, Germany
- 107 <sup>34</sup>Institute for Stroke and Dementia Research (ISD), University Hospital, LMU Munich, Munich, Germany.
- 108 <sup>35</sup>German Center for Neurodegenerative Diseases (DZNE), Munich, Germany
- 109 <sup>36</sup>Munich Cluster for Systems Neurology (SyNergy), Munich, Germany
- 110 <sup>37</sup>Department of Psychiatry and Comprehensive Center of Neuroscience and Mental Health, Medical University of  
111 Vienna, Vienna, Austria

- 112 <sup>38</sup>Department of Psychiatry and Psychotherapy, LVR-Klinikum Essen, University of Duisburg-Essen, Germany  
113 Medical Faculty, Germany
- 114 <sup>39</sup>Department of Psychiatry, Psychosomatics and Psychotherapy, Center of Mental Health, University Hospital of  
115 Würzburg, Germany
- 116 <sup>40</sup>Institute of Social Medicine, Occupational Health and Public Health, University of Leipzig, 04103 Leipzig,  
117 Germany.
- 118 <sup>41</sup>Department of Geriatric Psychiatry, Central Institute for Mental Health Mannheim, Faculty Mannheim, University  
119 of Heidelberg, Germany
- 120 <sup>42</sup>Neurological Tissue Bank - Biobanc- Hospital Clinic -FRCB - IDIBAPS, Barcelona, Spain
- 121 <sup>43</sup>Alzheimer's disease and other cognitive disorders Unit. Neurology Department, Hospital Clinic, Barcelona,  
122 Spain
- 123 <sup>44</sup>German Center for Neurodegenerative Diseases (DZNE), Magdeburg, Germany
- 124 <sup>45</sup>Institute of Cognitive Neurology and Dementia Research (IKND), Otto-von-Guericke University, Magdeburg,  
125 Germany
- 126 <sup>46</sup>Center for Cognitive Disorders, Department of Psychiatry and Psychotherapy, Technical University of Munich,  
127 School of Medicine, Munich, Germany
- 128 <sup>47</sup>Department of Psychiatry and Psychotherapy, University Medical Center Goettingen, Goettingen, Germany
- 129 <sup>48</sup>German Center for Neurodegenerative Diseases (DZNE), Goettingen, Germany
- 130 <sup>49</sup>Medical Science Department, iBiMED, Aveiro, Portugal
- 131 <sup>50</sup>Institute of Human Genetics, University of Bonn, School of Medicine & University Hospital Bonn, Bonn,  
132 Germany
- 133 <sup>51</sup>Institute for Urban Public Health, University Hospital Essen, University Duisburg-Essen, Germany
- 134 <sup>52</sup>1st Department of Neurology, Medical school, Aristotle University of Thessaloniki, Thessaloniki, Makedonia,  
135 Greece
- 136 <sup>53</sup>1st Department of Neurology, Aiginition Hospital, National and Kapodistrian University of Athens, Medical  
137 School, Greece
- 138 <sup>54</sup>Department of Neurology, Columbia University, New York, NY, USA
- 139 <sup>55</sup>Genetics of Neurodegenerative Diseases Unit IIB Sant Pau, Barcelona, Spain
- 140 <sup>56</sup>Department of Neurology. Hospital Universitario Donostia. San Sebastian, Spain
- 141 <sup>57</sup>Neurosciences Area. Instituto Biogipuzkoa. San Sebastian, Spain
- 142 <sup>58</sup>Unitat de Genètica Molecular, Institut de Biomedicina de València-CSIC, Valencia, Spain
- 143 <sup>59</sup>Centro de Biología Molecular Severo Ochoa (UAM-CSIC), Spain
- 144 <sup>60</sup>Instituto de Investigación Sanitaria 'Hospital la Paz' (IdIPaz), Madrid, Spain
- 145 <sup>61</sup>Universidad Autónoma de Madrid
- 146 <sup>62</sup>Unit of Neurodegenerative diseases, Department of Neurology, University Hospital Germans Trias i Pujol,  
147 Badalona, Barcelona, Spain
- 148 <sup>63</sup>The Germans Trias i Pujol Research Institute (IGTP), Badalona, Barcelona, Spain
- 149 <sup>64</sup>Alzheimer's disease and other cognitive disorders unit. Service of Neurology. Hospital Clínic of Barcelona.  
150 Institut d'Investigacions Biomèdiques August Pi i Sunyer, University of Barcelona, Barcelona, Spain
- 151 <sup>65</sup>Laboratorio de Genética. Hospital Universitario Central de Asturias, Oviedo, Spain
- 152 <sup>66</sup>Instituto de Investigación Sanitaria del Principado de Asturias (ISPA), Spain
- 153 <sup>67</sup>Center of Neuropsychiatry and Behavior Neurology, School of Medicine, University of Buenos Aires, Argentina
- 154 <sup>68</sup>Hospital Interzonal General de Agudos-Eva Perón, Argentina
- 155 <sup>69</sup>Laboratory of Brain Aging and Neurodegeneration. Fundacion Instituto Leloir-IIBBA, Argentina
- 156 <sup>70</sup>Studies in Neuroscience and Complex Systems Unit-CONICET-HEC-UNAJ, Argentina
- 157 <sup>71</sup>Research Center and Memory clinic. ACE Alzheimer Center Barcelona, Universitat Internacional de Catalunya,  
158 Spain
- 159 <sup>72</sup>Unidad de Trastornos del Movimiento, Servicio de Neurología y Neurofisiología. Instituto de Biomedicina de  
160 Sevilla (IBiS), Hospital Universitario Virgen del Rocío/CSIC/Universidad de Sevilla, Seville, Spain
- 161 <sup>73</sup>Instituto de Biomedicina de Sevilla, IBiS/Hospital Universitario Virgen de Valme, Spain
- 162 <sup>74</sup>Departamento de Bioquímica Médica, Biología Molecular e Inmunología. Facultad de Medicina. Universidad de  
163 Sevilla. Sevilla, Spain
- 164 <sup>75</sup>Unitat Trastorns Cognitius, Hospital Universitari Santa Maria de Lleida, Lleida, Spain
- 165 <sup>76</sup>Institut de Recerca Biomèdica de Lleida (IRBLleida), Lleida, Spain
- 166 <sup>77</sup>Alzheimer Research Center & Memory Clinic, Andalusian Institute for Neuroscience, Málaga, Spain.
- 167 <sup>78</sup>Departamento de Especialidades Quirúrgicas, Bioquímica e Inmunología. Facultad de Medicina. Universidad de  
168 Málaga. Málaga, Spain

- 169 <sup>79</sup>Neurology Service, Marqués de Valdecilla University Hospital (University of Cantabria and IDIVAL), Santander,  
170 Spain.
- 171 <sup>80</sup>Institute of Clinical Medicine - Neurology, University of Eastern Finland, Finland
- 172 <sup>81</sup>Institute of Biomedicine, University of Eastern Finland, Finland
- 173 <sup>82</sup>Faculty of Medicine, University of Lisbon, Portugal
- 174 <sup>83</sup>Clinic of Neurology, UH "Alexandrovska", Medical University - Sofia, Sofia, Bulgaria
- 175 <sup>84</sup>Department of Neurology, UH "Alexandrovska", Medical University, Sofia, Bulgaria
- 176 <sup>85</sup>Memory Clinic, Department of Neurology, Charles University, 2nd Faculty of Medicine and Motol University  
177 Hospital, Czech Republic
- 178 <sup>86</sup>International Clinical Research Center, St. Anne's University Hospital Brno, Brno, Czech Republic
- 179 <sup>87</sup>Department of Clinical Biochemistry, Copenhagen University Hospital - Rigshospitalet, Copenhagen, Denmark
- 180 <sup>88</sup>Department of Clinical Medicine, University of Copenhagen, Copenhagen, Denmark
- 181 <sup>89</sup>Department of Clinical Genetics, VU University Medical Centre, Amsterdam, The Netherlands
- 182 <sup>90</sup>Department of Neurology, ErasmusMC, the Netherlands
- 183 <sup>91</sup>Maastricht University, Department of Psychiatry & Neuropsychologie, Alzheimer Center Limburg, Maastricht, the  
184 Netherlands
- 185 <sup>92</sup>Department of Radiology&Nuclear medicine, ErasmusMC, the Netherlands
- 186 <sup>93</sup>Unit for Hereditary Dementias, Theme Aging, Karolinska University Hospital-Solna, 171 64 Stockholm Sweden
- 187 <sup>94</sup>Aging Research Center, Department of Neurobiology, Care Sciences and Society, Karolinska Institutet and  
188 Stockholm University, Stockholm, Sweden
- 189 <sup>95</sup>Dept.of Public Health and Carins Sciences / Geriatrics, Uppsala University, Sweden
- 190 <sup>96</sup>Université Paris-Saclay, CEA, Centre National de Recherche en Génomique Humaine (CNRGH), 91057, Evry,  
191 France
- 192 <sup>97</sup>Department of Surgery, Federal University of Minas Gerais (UFMG) Belo Horizonte, Minas Geraes, Brazil
- 193 <sup>98</sup>Department of Psychiatry, Federal University of Minas Gerais (UFMG) Belo Horizonte, Minas Geraes, Brazil
- 194 <sup>99</sup>Psychiatry Service of the University Hospital, Federal University of Minas Gerais, Belo Horizonte, Minas Geraes,  
195 Brazil
- 196 <sup>100</sup>The John P. Hussman Institute for Human Genomics, University of Miami, Miami, Florida, USA
- 197 <sup>101</sup>Department of Medical and Molecular Genetics, Indiana University, Indianapolis, Indiana, USA
- 198 <sup>102</sup>Department of Psychiatry, Washington University School of Medicine, St. Louis, MO 63110, USA
- 199 <sup>103</sup>NeuroGenomics and Informatics Center, Washington University School of Medicine, St. Louis, MO 63110, USA
- 200 <sup>104</sup>Department of Epidemiology and Biostatistics, Case Western Reserve University, Cleveland, Ohio, USA
- 201 <sup>105</sup>Department of Biostatistics, Boston University, Boston, Massachusetts, USA
- 202 <sup>106</sup>Department of Epidemiology, Boston University, Boston, Massachusetts, USA
- 203 <sup>107</sup>Department of Medicine (Biomedical Genetics), Boston University, Boston, Massachusetts, USA
- 204 <sup>108</sup>Department of Neurology, Boston University, Boston, Massachusetts, USA
- 205 <sup>109</sup>Department of Ophthalmology, Boston University, Boston, Massachusetts, USA
- 206 <sup>110</sup>Department of Biostatistics, Boston University School of Public Health, Boston, MA, USA
- 207 <sup>111</sup>Department of Genome Sciences, University of Washington, Seattle, Washington, USA
- 208 <sup>112</sup>Department of Medicine (Medical Genetics), University of Washington, Seattle, Washington, USA
- 209 <sup>113</sup>Department of Biostatistics, University of Washington, Seattle, Washington, USA
- 210 <sup>114</sup>Taub Institute on Alzheimer's Disease and the Aging Brain, Department of Neurology, Columbia University,  
211 New York, New York, USA
- 212 <sup>115</sup>Gertrude H. Sergievsky Center, Columbia University, New York, New York, USA
- 213 <sup>116</sup>Dr. John T. Macdonald Foundation Department of Human Genetics, University of Miami, Miami, Florida, USA
- 214 <sup>117</sup>Department of Neuroscience, Mount Sinai School of Medicine, New York, New York, USA
- 215 <sup>118</sup>Penn Neurodegeneration Genomics Center, Department of Pathology and Laboratory Medicine, University of  
216 Pennsylvania Perelman School of Medicine, Philadelphia, Pennsylvania, USA
- 217 <sup>119</sup>Department of Neurology, Columbia University, New York, New York, USA
- 218 <sup>120</sup>Unifomed Services University of the Health Sciences; The American Genome Center, Bethesda, USA
- 219 <sup>121</sup>Univ Rouen Normandie, Normandie Univ, Inserm U1245 and CHU Rouen, Department of Genetics and CNR-  
220 MAJ, F 76000 Rouen, France
- 221 <sup>122</sup>Inserm, Bordeaux Population Health Research Center, UMR 1219, Univ. Bordeaux, ISPED, CIC 1401-EC, Univ  
222 Bordeaux,Bordeaux, France
- 223 <sup>123</sup>CHU de Bordeaux, Pole santé publique, Bordeaux, France
- 224 <sup>124</sup>Univ Lille Inserm 1171, CHU Clinical and Research Memory Research Centre (CMRR) of Distalz Lille France.
- 225 <sup>125</sup>Université de Paris, EA 4468, APHP, Hôpital Broca, Paris, France
- 226 <sup>126</sup>University Bordeaux, Inserm, Bordeaux Population Health Research Center, France



- 227 <sup>127</sup>Department of Neurology, Bordeaux University Hospital, Bordeaux, France
- 228 <sup>128</sup>Department of Child and Adolescent Psychiatry and Psychotherapy, University Hospital of Psychiatry Zurich,  
229 University of Zurich, Zurich, Switzerland
- 230 <sup>129</sup>Neuroscience Center Zurich, University of Zurich and ETH Zurich, Switzerland
- 231 <sup>130</sup>Zurich Center for Integrative Human Physiology, University of Zurich, Switzerland
- 232 <sup>131</sup>Old Age Psychiatry, Department of Psychiatry, Lausanne University Hospital, Lausanne, Switzerland
- 233 <sup>132</sup>Department of Geriatric Psychiatry, University Hospital of Psychiatry Zürich, Zürich, Switzerland
- 234 <sup>133</sup>Institute for Regenerative Medicine, University of Zürich, Switzerland
- 235 <sup>134</sup>Public Health Nutrition Unit, Institute of Nutrition and Food Technology, University of Chile, Chile
- 236 <sup>135</sup>Interuniversity Center for Healthy Aging RED21993, Chile
- 237 <sup>136</sup>Biomedica Research Group, Centro de Estudios Clínicos, Santiago, Chile
- 238 <sup>137</sup>Departamento de Psiquiatría y Salud Mental, Campus Oriente, Facultad de Medicina, Universidad de Chile,  
239 Santiago, Chile
- 240 <sup>138</sup>Instituto Nacional de Geriátría, Santiago, Chile
- 241 <sup>139</sup>Geroscience Center for Brain Health and Metabolism, Santiago, Chile
- 242 <sup>140</sup>Latin American Institute for Brain Health (BrainLat), Universidad Adolfo Ibanez, Chile
- 243 <sup>141</sup>Memory and Neuropsychiatric Center (CMYN) Neurology Department, Hospital del Salvador y Facultad de  
244 Medicina, Universidad de Chile. Santiago, Chile
- 245 <sup>142</sup>Interuniversity Center for Healthy Aging RED21993, Santiago, Chile
- 246 <sup>143</sup>Geriatrics Section Clinical Hospital University of Chile, Chile
- 247 <sup>144</sup>Neurology Service Hospital del Salvador, Santiago, Chile
- 248 <sup>145</sup>Centre for Precision Health, Edith Cowan University, Joondalup, Perth, Australia
- 249 <sup>146</sup>Collaborative Genomics and Translation Group, School of Medical and Health Sciences, Edith Cowan  
250 University, Joondalup, Perth, Australia
- 251 <sup>147</sup>Curtin Health Innovation Research Institute, Curtin University, Bentley, Perth, Australia
- 252 <sup>148</sup>Centre for Healthy Brain Ageing, School of Psychiatry, Faculty of Medicine, University of New South Wales,  
253 Sydney, Australia
- 254 <sup>149</sup>Center of Excellence for Stress and Mental Health (CESAMH), VA San Diego Healthcare System, San Diego,  
255 CA, USA
- 256 <sup>150</sup>Center for Behavior Genetics of Aging, University of California San Diego, La Jolla, CA, USA
- 257 <sup>151</sup>VA San Diego Healthcare System, San Diego, CA, USA; Department of Psychiatry
- 258 <sup>152</sup>Department of Psychiatry, University of California San Diego, La Jolla, CA, USA
- 259 <sup>153</sup>Center of Excellence for Stress and Mental Health, VA San Diego Healthcare System, San Diego, CA, USA
- 260 <sup>154</sup>Center for Behavior Genetics of Aging, University of California, San Diego, La Jolla, CA, USA
- 261 <sup>155</sup>Massachusetts Veterans Epidemiology Research and Information Center (MAVERIC), VA Boston Healthcare  
262 System, Boston, MA, USA
- 263 <sup>156</sup>Division of Aging, Brigham & Women's Hospital, Harvard Medical School, Boston, Massachusetts, USA
- 264 <sup>157</sup>Molecular Markers Laboratory, IRCCS Istituto Centro San Giovanni di Dio Fatebenefratelli, Brescia, Italy
- 265 <sup>158</sup>Neurodegenerative Diseases Unit, Fondazione IRCCS Ca' Granda, Ospedale Policlinico, Milan, Italy
- 266 <sup>159</sup>Dept. of Biomedical, Surgical and Dental Sciences, University of Milan, Milan, Italy
- 267 <sup>160</sup>Department of Clinical Sciences and Community Health, University of Milan, 20122 Milan, Italy
- 268 <sup>161</sup>Institute of Gerontology and Geriatrics, Department of Medicine and Surgery, University of Perugia, Italy
- 269 <sup>162</sup>Division of Clinical Geriatrics, Department of Neurobiology, Care Sciences and Society, Karolinska Institutet,  
270 Stockholm, Sweden
- 271 <sup>163</sup>Interdisciplinary Department of Medicine, Geriatric Medicine and Memory Unit, University of Bari "A. Moro, Bari,  
272 Italy
- 273 <sup>164</sup>Centre for Memory Disturbances, Lab of Clinical Neurochemistry, Section of Neurology, University of Perugia,  
274 Italy
- 275 <sup>165</sup>Department of Biomedical Sciences, University of Cagliari, Italy.
- 276 <sup>166</sup>Neurology, IRCCS San Gerardo dei Tintori, Monza and University of Milano-Bicocca, Italy
- 277 <sup>167</sup>Department of Clinical and Experimental Sciences, University of Brescia Italy
- 278 <sup>168</sup>Department of Continuity of Care and Frailty, ASST Spedali Civili Brescia, Brescia, Italy
- 279 <sup>169</sup>Department of Neuroscience, Psychology, Drug Research and Child Health University of Florence, Italy
- 280 <sup>170</sup>IRCCS Fondazione Don Carlo Gnocchi, Florence, Italy
- 281 <sup>171</sup>Past Director Dementia Unit University of Parma , Parma, Italy
- 282 <sup>172</sup>Department of Hematology and Stem Cell Transplant, Vito Fazzi Hospital, Lecce, Italy
- 283 <sup>173</sup>Department of Neuroscience "Rita Levi Montalcini", University of Torino, Torino, Italy
- 284 <sup>174</sup>Department of Neuroscience, Università Cattolica del Sacro Cuore, Rome, Italy.

285 <sup>175</sup>Neurology Unit, IRCCS Fondazione Policlinico Universitario A. Gemelli, Rome, Italy.  
286 <sup>176</sup>Laboratory of Neuropsychiatry, IRCCS Santa Lucia Foundation, Rome, Italy  
287 <sup>177</sup>Niigata University, Brain Research Institute, Japan  
288 <sup>178</sup>Research Center, National Center for Geriatrics and Gerontology, Japan  
289 <sup>179</sup>UK Dementia Research Institute, Cardiff University, UK  
290 <sup>180</sup>Institute of Neurology, Catholic University of the Sacred Heart, Rome, Italy  
291 <sup>181</sup>Department of Neurology, Amitié Hospital, Bangui, Central African Republic  
292 <sup>182</sup>Department of Neurology, Brazzaville University Hospital, Brazzaville, Republic of Congo  
293 <sup>183</sup>Department of Radiology, Indiana University, Indianapolis, Indiana, USA  
294 <sup>184</sup>Department of Psychiatry and Psychotherapy, Faculty of Medicine and University Hospital Cologne, University  
295 of Cologne, Cologne, Germany  
296 <sup>185</sup>Cluster of Excellence Cellular Stress Responses in Aging-associated Diseases (CECAD), University of  
297 Cologne, Cologne, Germany  
298 <sup>186</sup>Translational Health Sciences, Bristol Medical School, University of Bristol, Bristol, UK  
299 <sup>187</sup>Department of Epidemiology, ErasmusMC, Rotterdam, The Netherlands  
300 <sup>188</sup>Nuffield Department of Population Health Oxford University, Oxford, UK  
301 <sup>189</sup>High Institute of Biotechnology, University of Monastir, Monastir, Tunisia.  
302 <sup>190</sup>Laboratory of Genetics, Immunology and Human Pathology, Faculty of Science of Tunis, University of Tunis El  
303 Manar, 2092 Tunis, Tunisia.  
304 <sup>191</sup>Alzheimer's Centre Reina Sofia-CIEN Foundation-ISCIII, 28031 Madrid, Spain.  
305 <sup>192</sup>Dept. of Public Health and Caring Sciences / Geriatrics, Uppsala University, Uppsala, Sweden  
306 <sup>193</sup>Krembil Brain Institute, University Health Network, Toronto, Ontario, Canada  
307 <sup>194</sup>Tanz Centre for Research in Neurodegenerative Diseases, Departments of Medicine and Laboratory Medicine  
308 & Pathobiology, University of Toronto, Toronto, Ontario, Canada  
309 <sup>195</sup>Bordeaux, INSERM, Bordeaux Population Health Research Center, UMR 1219, Bordeaux, France  
310 <sup>196</sup>Fondazione IRCCS Istituto Neurologico Carlo Besta, Milan, Italy  
311 <sup>197</sup>NORMENT Centre, Division of Mental Health and Addiction, Oslo University Hospital, Oslo, Norway  
312 <sup>198</sup>Institute of Clinical Medicine, University of Oslo, Oslo, Norway  
313 <sup>199</sup>Centre for Neuropsychiatric Genetics and Genomics, School of Medicine, Cardiff University, UK  
314 <sup>200</sup>Research Center and Memory clinic Fundació ACE, Institut Català de Neurociències Aplicades, Universitat  
315 Internacional de Catalunya, Barcelona, Spain  
316 <sup>201</sup>Department of Neurodegenerative diseases and Geriatric Psychiatry, University Hospital Bonn, Medical  
317 Faculty, Bonn, Germany  
318 <sup>202</sup>Department of Psychiatry & Glenn Biggs Institute for Alzheimer's and Neurodegenerative Diseases, San  
319 Antonio, TX, USA  
320 <sup>203</sup>National Center for PTSD, Behavioral Sciences Division, VA Boston Healthcare System, Boston MA  
321 <sup>204</sup>Department of Psychiatry, Boston University Chobanian & Avedisian School of Medicine, Boston MA  
322 <sup>205</sup>Biomedical genetics/Department of Medicine, Boston University Chobanian & Avedisian School of Medicine,  
323 Boston MA.  
324 <sup>206</sup>Department of Biostatistics, Boston University School of Public Health, Boston, MA.

325 **We built a genetic risk score (GRS) from the most complete landscape of the**  
326 **Alzheimer disease (AD) genetics. We extended its analysis in 16 European countries**  
327 **and observed a consistent association of this GRS with AD risk, age at onset and**  
328 **cerebrospinal fluid (CSF) AD biomarker levels regardless of the *Apolipoprotein E***  
329 **(*APOE*) genotype. This GRS was also associated with AD risk (independently of**  
330 ***APOE*) with a decreasing order of magnitude in those with an European-American,**  
331 **North-African, East-Asian, Latin-American, African-American background respectively.**  
332 **No association of the GRS to AD was seen in sub-Saharan African and Indian**  
333 **populations. This GRS captures information specific to AD as its association**  
334 **decreases as the diagnosis broadens. In conclusion, a simple GRS captures shared**  
335 **genetic information specific to AD between multi-ancestry populations. However,**  
336 **more population diversity is needed to better understand the AD genetic complexity**  
337 **across populations.**  
338

339 Over the past 15 years, genome-wide association studies (GWAS) have successfully  
340 identifying the genetic component of multifactorial diseases. This has led to the development  
341 of several powerful approaches that help decipher pathophysiological processes and  
342 propose potential diagnostic/prognostic tools. These tools include GRS, a cumulative effect  
343 score summarizing the information distributed across individual susceptibility genome-wide  
344 significant variants or polygenic risk scores (PRS, an extension of GRS to loci of small effect,  
345 without genome-wide significant associations to potentially capture additional predictive  
346 capacity<sup>1</sup>.

347 Due to high estimate of the genetic component of AD, i.e., heritability of 60-80% in twin  
348 studies<sup>2</sup>, such GRSs/PRSs have logically been of particular interest in this pathology. Many  
349 GRS/PRS have therefore been developed to assess their associations with AD and related  
350 disease (ADRD) risk or with ADRD-related endophenotypes such as age at onset<sup>3</sup>, brain  
351 imaging<sup>4-6</sup> or CSF biomarkers<sup>7,8</sup>. In almost of these studies, the GRSs/PRSs were  
352 significantly associated with the quantitative or binary traits of interest. However,  
353 comparisons between publications, even for the same trait such as AD risk, appear to be  
354 difficult due to obvious differences in the populations analyzed, heterogeneity in summary  
355 statistics and in the variants included, or different statistical methods used to calculate the  
356 PRSs<sup>9</sup>. In addition, most of the GRSs/PRSs approaches have been developed utilizing  
357 European ancestry populations, and only a few studies have investigated the relevance of  
358 such tools in different ancestries<sup>10,11</sup>.

359 Recently, a GRS built from the most complete and reliable landscape of AD genetics,  
360 including 75 AD risk loci (and 83 independent signals excluding *APOE*) generated by the  
361 European Alzheimer & Dementia Biobank (EADB) consortium, was tested in a limited  
362 number of European ancestry cohorts<sup>12</sup>. This GRS was found to be associated with the risk  
363 of developing future AD/dementia in population-based studies, or of progressing from mild  
364 cognitive impairment to AD/dementia. In this context, we decided to validate the association  
365 of this GRS with AD risk, CSF biomarker levels and age at onset in populations from 16  
366 European countries. We also decided to extend the study of this GRS to include different  
367 ancestries from Asia, Africa and Latin America.

368 The different populations analyzed in this work are described in Supplementary Table 1. Two  
369 main GRSs were calculated (see Supplementary Table 1 for the different adjustments used  
370 per population and Supplementary Table 2 for the list of SNPs used); (i) a GRS including the  
371 genome-wide significant and independent sentinel SNPs at the loci reported by Bellenguez  
372 et al. (referred to as GRS<sup>ALZ</sup>) and (ii) a GRS including these sentinel SNPs and adjusted for  
373 the number of *APOE*- $\epsilon$ 2 and *APOE*- $\epsilon$ 4 alleles (GRS<sup>ALZadjAPOE</sup>).

374 We first analyzed the association of these GRSs with the risk of developing AD in case-  
375 control studies from 16 countries representative of the European genetic diversity of the  
376 EADB. All the GRS distributions in cases and controls are shown in Supplementary Figures  
377 1-3. All countries were analyzed independently and the Odd Ratios (ORs) indicate the effect  
378 of the GRS as the increase in the risk of AD associated with each additional allele of average  
379 risk in the GRS. GRS<sup>ALZ</sup> appeared to be significantly associated with AD in a homogeneous

380 manner across Europe. The association of  $GRS^{ALZ}$  with AD risk was little affected when the  
381 impact of  $\epsilon 2/\epsilon 3/\epsilon 4$  *APOE* alleles ( $GRS^{ALZadjAPOE}$ ) was considered (Fig. 1). Of note,  
382  $GRS^{ALZadjAPOE}$  was also associated with a younger age at onset (Supplementary Fig. 4).  
383 We then generated a mega-analysis based on the EADB datasets of the 16 European  
384 countries in order to assess in the most precise way, the risk of developing AD according to  
385 GRS strata, i.e. 0-2%, 2-5%, 10-20%, 20-40%, 60-80%, 80-90%, 90-95%, 95-98% and finally  
386 98-100%. The 40-60% GRS stratum was used as the reference. In this analysis, we also  
387 generated a GRS including the sentinel SNPs of the GWAS loci but also the two SNPs  
388 defining the  $\epsilon 2/\epsilon 3/\epsilon 4$  *APOE* alleles ( $GRS^{ALZinclAPOE}$ ). Results are shown in Fig 2A and as  
389 expected the risk of developing AD in the most extreme strata is particularly high when  
390 *APOE* is included in the GRS. However, association of  $GRS^{ALZ}$  was also significant in all the  
391 strata analyzed and not impacted when adjusted for the number of *APOE*- $\epsilon 2$  and *APOE*- $\epsilon 4$   
392 alleles ( $GRS^{ALZadjAPOE}$ ). In the two extreme 0-2% and 98-100% strata, both  $GRS^{ALZ}$  and  
393  $GRS^{ALZadjAPOE}$  were associated with a decrease of more than 2-fold or an increase of more  
394 than 3-fold of the AD risk when compared with the 40-60% stratum (see Fig. 2A and  
395 Supplementary Table 3).  
396 Since all the analyses suggested an association of  $GRS^{ALZ}$  independently of the *APOE*  
397 status, we took advantage of our large mega-analysis to fully address how  $GRS^{ALZ}$  interacts  
398 with the *APOE* genotypes. For this purpose, we stratified in 4 groups the mega-analysis  
399 according to the *APOE* genotype by grouping together the  $\epsilon 2\epsilon 2/\epsilon 2\epsilon 3$ ,  $\epsilon 3\epsilon 3$ ,  $\epsilon 2\epsilon 4/\epsilon 3\epsilon 4$ ,  $\epsilon 4\epsilon 4$   
400 carriers. We then assessed in each of these subpopulations, the association of  $GRS^{ALZ}$  with  
401 AD risk per quintile strata (0-20%, 20-40%, 60-80% and 80-100%) with the 40-60% stratum  
402 as a reference. Remarkably,  $GRS^{ALZ}$  appeared to be homogeneously associated with AD risk  
403 in all the strata indicating that the *APOE* and  $GRS^{ALZ}$  risk are independent (Fig. 2B and  
404 Supplementary Table 4).  
405 To determine whether these GRSs are associated with pathophysiological processes known  
406 to be involved in the AD pathology, we used a large GWAS on CSF A $\beta$ 42, Tau and p-Tau  
407 that we generated through EADB, including 5,944 individuals<sup>13</sup>.  $GRS^{ALZ}$  was associated with  
408 a decrease in A $\beta$ 42 levels and with an increase in Tau and pTau levels that fits with the  
409 increased AD risk associated with this GRS (Fig. 3).  $GRS^{ALZadjAPOE}$  was similarly significantly  
410 associated with these endophenotype levels (Fig. 3). It should be noted that although the  
411 association of these GRSs with the level of A $\beta$ 42 in CSF appears to be highly heterogeneous  
412 between populations, their associations with the levels of Tau and p-Tau are, on the contrary,  
413 highly homogeneous in the same populations. This could be interpreted as Tau and p-Tau  
414 concentrations directly reflecting pathophysiological processes (probably neuronal) that  
415 depend on the genetic factors of Alzheimer's disease. CSF A $\beta$ 42 concentrations, on the  
416 other hand, would depend on multiple intermediate processes, leading to the heterogeneity  
417 observed between the different populations.  
418 Following the assessment of these GRS associations with AD risk and endophenotypes in  
419 European populations, we thought to extend their analyses to other European-ancestry  
420 populations (USA) but to include also populations from India, East-Asia (China, Japan and  
421 Korea), North-Africa (Tunisia), sub-Saharan Africa (Central African Republic/the Congo  
422 Republic), South-America (Argentina, Brazil, Chile, and Colombia) as well as African-,  
423 Native- and Latino-American admixture populations from US studies (more than 75%  
424 African- or Native-American ancestry or self-reporting for Latino-American populations) (Fig.  
425 4). With the exception of Korea, where 71 SNPs were available, most GRSs were  
426 constructed from 79-85 SNPs including *APOE* variants, supplementary Table 2). All the GRS  
427 distributions in cases and controls are shown in Supplementary Figure 5-7. Of note, the  
428 association of *APOE* with AD risk was heterogenous between these different populations as  
429 previously described in several prior studies (Figure 4 and Supplementary Table 5)<sup>14,15</sup>.  
430 As expected, the AD risk associated with  $GRS^{ALZ}$  or  $GRS^{ALZadjAPOE}$  was highly similar  
431 between European and other European-ancestry populations (USA). Both GRSs were  
432 significantly associated with AD risk with a decreasing order of magnitude from Maghreb,  
433 East-Asian countries, Latino-American to African-American population admixture (Fig. 5 and



434 Supplementary Table 6). However, these GRSs had no association with risk of AD in the  
435 sub-Saharan African and Indian populations. This may be related to the small sample size,  
436 which resulted in the study lacking statistical power. However, in African-American  
437 admixture, the magnitude of association decreased as the African ancestry percentage  
438 increases, to finally reach a level similar to that observed in our sub-Saharan African  
439 population: association of  $GRS^{ALZadjAPOE}$  with AD risk populations with more than 90% African  
440 ancestry is  $OR=1.02$  (95% CI 1.00-1.05,  $P=9 \times 10^{-2}$ ). This observation supports the  
441 expectation that GRSs constructed on genetic data generated from European ancestry  
442 populations perform poorly in African ancestry populations. Similarly, in ADSP Native-  
443 American admixture, the magnitude of association decreased as the Native-American  
444 ancestry percentage increases (from  $OR=1.05$  95% CI 1.03-1.07,  $P=4.1 \times 10^{-6}$ ,  $OR=1.04$  95%  
445 CI 1.02-1.06,  $P=9.0 \times 10^{-4}$  to  $OR=1.03$  95% CI 1.01-1.06,  $P=5.0 \times 10^{-3}$ , respectively in the  
446 populations with more than 50%, 75% and 90% Native-American ancestry). Notably, a  
447 similar finding was seen in Chilean and Argentinian populations where the  
448  $GRS^{ALZ}$  association diminishes when the Native American ancestry rises<sup>16</sup>. Of note,  
449  $GRS^{ALZadjAPOE}$  was also associated with a younger age at onset in most of the populations  
450 studied (at least 100 AD cases) at the notable exception of the Chinese and Korean  
451 populations Supplementary Fig. 8). Of note, the APOE  $\epsilon 2/\epsilon 3/\epsilon 4$  alleles strongly influence  
452 age at onset in these two populations (Supplementary Fig. 9).

453 To refine our analysis in multi-ancestry populations, we calculated the association of  
454  $GRS^{ALZadjAPOE}$  and  $GRS^{ALZinclAPOE}$  with AD risk per quintile strata (0-20%, 20-40%, 60-80% and  
455 80-100%) with the 40-60% stratum as a reference in all our populations. Of note, Salsa,  
456 Indian, North-Africa and sub-Saharan Africa populations were excluded because of their  
457 small sample size. Results were then meta-analyzed in order to increase statistical power.  
458 Consistent with the results shown in Figure 5, the  $GRS^{ALZadjAPOE}$  association is very similar  
459 between the European-ancestry and East-Asian populations, but less marked with the  
460 Latino-American populations and the African-American admixture populations (Fig. 6 and  
461 supplementary Table 7).

462 Finally, we took advantage of the Million Veteran Project (MVP) to assess how the  
463 association of  $GRS^{ALZadjAPOE}$  with the risk of AD behaved in multi-ancestry populations  
464 according to the diagnosis of dementia, that is, to see how a GRS derived from case/control  
465 studies using a specific diagnosis of AD performed when the diagnosis was broadened to  
466 dementia.  $GRS^{ALZadjAPOE}$  showed a decreasing association with AD risk as the diagnosis  
467 became less specific, irrespective of the multi-ancestry populations studied (Table 1).  
468

469 By studying a large multi-ancestry diversity, our work highlights the importance of cross-  
470 ancestry studies in unravelling the genetic complexities of this devastating disease and  
471 contributes significantly to the understanding of AD risk assessment in diverse populations.  
472 The vast majority of GWAS data available worldwide have been developed in European-  
473 ancestry populations and the study of the genetics of AD is no exception, especially as the  
474 diagnosis of the disease is most often based on specialized clinical structures. This makes  
475 studying this disease more difficult in low- and middle-income countries. This is beginning to  
476 change as new case-control studies are developed worldwide. However, it is difficult to  
477 compare the results obtained in European-ancestry GWASs since GWAS studies in these  
478 non-European populations are currently of a size that is at best comparable to that of  
479 European studies in the early 2010s<sup>17,18</sup>. These studies are therefore underpowered to detect  
480 at a genome-wide significant level most of the loci found in European populations. In  
481 addition, the small size of some of these populations means that there is a risk of generating  
482 false positives, as in silico replication is difficult given the sparsity of samples from that  
483 population.

484 To address some of these limitations, we have chosen to develop a simple approach to  
485 better compare AD genetics across many populations worldwide. We used a GRS combining  
486 sentinel SNPs associated with the risk of developing AD in populations of European origin,  
487 as described previously<sup>12</sup>. We tested its association with the risk of developing AD in the  
488 largest panel of diverse populations studied to date. We were able to observe a systematic

489 association of this GRS with all the populations under study, with the exception of Indian and  
490 African Sub-Saharan populations, probably partly due to lack of statistical power. Our results  
491 thus suggest that all multi-ancestry populations are likely to be affected by shared  
492 pathophysiological processes driven in part by these genetic risk factors.  
493 However, this study also reveals important differences between populations, especially in  
494 African-ancestry populations: ORs are lowest for populations from African countries or of  
495 African-American admixture, with the ORs in African-American population, when their %  
496 African ancestry reaches 90%, being similar to those measured in populations from sub-  
497 Saharan African countries. Our work thus suggests that the AD genetic architecture in  
498 African-ancestry populations strongly differs from European-ancestry populations. Higher  
499 genetic diversity is observed in African-ancestry populations compared to non-African-  
500 ancestry populations<sup>19-21</sup> and this likely implicates different causal variants in already known  
501 loci (as previously described for ABCA7<sup>22</sup> and/or different genes involved in the AD  
502 pathophysiology as previously proposed in<sup>23,24</sup>).

503 Such Genetic diversity likely explains part of the potential methodological reason for these  
504 variations of the GRS<sup>ALZ</sup> association across populations. First, although we attempted to  
505 develop a comparable GRS, some SNPs were not present in all the populations studied or  
506 were poorly imputed, with the likely consequence of underestimating the association of  
507 GRSs with AD risk in these populations. However, as these points mainly affect low-  
508 frequency variants (see Supplementary Table 2), their impacts on GRSs are likely to be  
509 limited. It should be noted that, limiting this imputation problem, some of the genetic data  
510 were generated from whole genome sequencing (Alzheimer disease sequencing project  
511 (ADSP) and China). Second, we used sentinel variants defined by populations of European  
512 ancestry. Most of these are unlikely to be the causal variants and therefore, they do not  
513 capture properly the association of a locus with the risk of developing AD in other ancestries  
514 as the linkage disequilibrium structure of the genome changes across ancestries. This has  
515 already been described for a number of other diseases and populations. The implementation  
516 of a PRS calculated based on well-powered GWAS data generated in the target population  
517 might solve this problem<sup>25,26</sup>. However, such an approach will require access to raw GWAS  
518 data from different populations to generate accurate multi-ancestry PRSs as for instance  
519 already generated in kidney diseases<sup>27</sup>. Finally, it has been estimated that around 10-20% of  
520 AD dementia is misdiagnosed, and we have observed that the more inaccurate the clinical  
521 diagnosis of AD dementia, the smaller the magnitude of the association in the GRS. This  
522 observation suggests that our current GRSs capture information specific to AD, but that the  
523 quality of the clinical diagnose may interfere with measuring the association of this GRS with  
524 the AD risk in a given population. This last point will have to be better controlled in the future  
525 with the introduction of standardized diagnosis between different populations, for example,  
526 based on biological markers (although there is also a need for more diversity in this field to  
527 define the relevance of biomarkers in multi-ancestry populations).

528 Finally, our study also confirms the strong heterogeneity in the *APOE*  $\epsilon 2/\epsilon 3/\epsilon 4$  associations  
529 with AD risk in different populations (Figure 4). Differential regulation of *APOE* expression  
530 related to different ancestral genomic background around the locus have been proposed to  
531 account for the differences in risk between populations of various ancestries<sup>28-31</sup>. In addition,  
532 it has also been postulated that interaction with other genetic risk factors for AD may be an  
533 explanation for this heterogeneity. However, our data also clearly indicate that GRS<sup>ALZ</sup>  
534 appears to be associated with AD risk regardless of *APOE* status whatever the population  
535 studied. This observation suggests that we may have two independent genetic entities for  
536 sporadic AD which fits remarkably well with the recent hypothesis of three variants of AD  
537 (autosomal dominant AD, *APOE*  $\epsilon 4$ -associated sporadic AD and *APOE*  $\epsilon 4$ -unassociated  
538 sporadic AD) that may lead to a possible revision of the current clinical taxonomy of AD<sup>32</sup>.

539 In conclusion, our various observations are a call for more genetic diversity in the study of  
540 Alzheimer's disease. Although a simple GRS based on the largest European-ancestry GWAS  
541 can capture relevant genetic information in most studied populations worldwide, there  
542 appears to be important genetic heterogeneity between these populations. Characterizing  
543 the global genetic architecture of AD in multi-ancestry populations (particularly African-

544 ancestry) may have important implications for understanding the pathophysiology of AD and  
545 accelerating the development of strategies to prevent and treat AD.

546

## 547 **Acknowledgments**

548 We thank the many study participants, researchers, and staff for collecting and contributing  
549 to the data and the high-performance computing service at the University of Lille. This work  
550 was funded by a grant (European Alzheimer&Dementia DNA BioBank, EADB) from the EU  
551 Joint Programme – Neurodegenerative Disease Research (JPND) and the Fondation  
552 Recherche Alzheimer. A.N. was supported by Fondation pour la recherche médicale  
553 (EQU202003010147). UMR1167 is also funded by the Inserm, Institut Pasteur de Lille, Lille  
554 Métropole Communauté Urbaine, and the French government’s LABEX DISTALZ program  
555 (development of innovative strategies for a transdisciplinary approach to Alzheimer’s  
556 disease). Full consortium acknowledgements and funding are in the Supplementary Note.

557

## 558 **Author contributions**

559 **Project coordination:** A.N., J-C.L; **data collection coordination:** A.N., Y.LG., J.G., M.D.G.,  
560 E.N.D.M., J-F.D., H.A., V.E-P., A.Rui., K.H.L., T.I., A.Ram., M.L., J-C.L; **Data analyses:** A.N,  
561 B.G-B., R.S., Y.K., M.K., I.D.R., C.D., X.Z., Y.L.G. C.E.A-B., M.A.C.B., M.Gue., S.v.d.L.,  
562 M.Gos., A.C., C.B., F.K; **EADB Sample contribution:** I.d.R., A.C., S.V.D.L., C.B., F.K.,  
563 O.P., A.Sch., M.D., D.R., N.Sch., D.J., S.R-H., L.H., L.M.P., E.D., O.G., J.Wilt., S.H-H.,  
564 S.Moe., T.T., N.Sca., J.C., F.M., J.P-T., M.J.B., P.P., R.S-V., V.Á. M.B., P.G-G., R.Pue.,  
565 P.Mir., L.M.R., G.P-R., J.M.G-A., J.L.R., E.R-R., H.S., T.K., A.d.M., S.Meh., J.Hor., M.V.,  
566 K.L.R., J.Q.T., Y.A.P., H.H. J.v.S., I.Ram., F.V., A.v.d.L. P.Sch., C.G., G.P., V.G., G.N.,  
567 C.Duf., F.P., O.H., S.D., A.B., J-F.Del., E.G., J.P., D.G., B.Aro., P.Mec., V.S., L.P., A.Squ.,  
568 L.T., B.Bor., B.N., P.C., D.S., I.Rai., A.Dan., J.Will., C.Mas., P.A., F.J., P.K., C.V.D., R.F-S.,  
569 T.M., P.S-J., K.S., M.I., G.R., M.H., R.Sim., W.v.d.F., O.A., A.Rui., A.Ram., J-C.L., **MVP**  
570 **Sample contribution:** R.She., R.H., V.M., M.P., R.Z., M.Gaz., M.L.; **Salsa Sample**  
571 **contribution:** M.Gos., C.S.B., B.F., Q.Y. S.S.; **ADSP Sample contribution:** A.Gri., T.F.,  
572 C.Cru., J.Hai., L.F., A.Des., E.W., R.M., M.P-V., B.K., A.Goa., G.D.S., B.V., L-S.W., Y.Y.L.,  
573 C.Dalg., A.Say., S.S.; **Africa sample contribution:** M.Gue., P-M.P., P.Mbe, B.Ban, J-  
574 F.Dar.; **East-Asia sample contribution:** Y.K., M.K., X.Z., H.C., N.Y.I., A.K.Y.F., F.C.F.I.,  
575 A.M., N.H., K.O., S.N., J.G., V.E-P., K.H.L., T.I.; **South America sample contribution:**  
576 C.Dalm., C.E.A-B., M.A.C.B., N.O., C.Muc., C.Cue., L.Cam., P.Sol., D.G.P., S.K., L.I.B., J.O-  
577 R., A.G.C.M.,M.F.M., R.Par., G.A., L.A.d.M., M.A.R.S., B.d.M.V., M.T.G.C., B.Ang., S.G.,  
578 M.V.C., R.A., P.O., A.Sla., C.G-B., C.A., P.F., E.N.d.M., L.M., H.A., A.Rui., A.Ram; **Core**  
579 **writing group:** A.N, B.G-B., J-C.L.

580

## 581 **Competing Interests Statement**

582 C.C. has received research support from: GSK and Eisai. The funders of the study had no  
583 role in the collection, analysis, or interpretation of data; in the writing of the report; or in the  
584 decision to submit the paper for publication. CC is a member of the advisory board of Vivid  
585 Genomics and Circular Genomics and owns stocks. L.M.P. received personal fees from  
586 Biogen for consulting activities unrelated to the submitted work T.G. received consulting fees  
587 from AbbVie, Alector, Anavex, Biogen, Cogthera, Eli Lilly, Functional Neuromodulation,  
588 Grifols, Iqvia, Janssen, Noselab, Novo Nordisk, NuiCare, Orphanzyme, Roche Diagnostics,  
589 Roche Pharma, UCB, and Vivoryon; lecture fees from Biogen, Eisai, Grifols, Medical  
590 Tribune, Novo Nordisk, Roche Pharma, Schwabe, and Synlab; and has received grants to  
591 his institution from Biogen, Eisai, and Roche Diagnostics.

## 592 References

- 593
- 594 1. Osterman, M.D. et al, Polygenic Risk Scores. *Curr. Protoc.* **1**, e126 (2021)
- 595 2. Gatz, M. et al., Role of genes and environments for explaining Alzheimer disease.
- 596 *Arch. Gen. Psychiatry* **63**, 168-74 (2006)
- 597 3. Desikan, R.S. et al, Genetic assessment of age-associated Alzheimer disease risk:
- 598 Development and validation of a polygenic hazard score. *PLoS Med.* **14**, e1002258
- 599 (2017)
- 600 4. Sabuncu, M.R et al, The association between a polygenic Alzheimer score and
- 601 cortical thickness in clinically normal subjects. *Cereb. Cortex* **22**, 2653-61 (2012)
- 602 5. Mormino, E.C. et al, Polygenic risk of Alzheimer disease is associated with early- and
- 603 late-life processes. *Neurology* **87**, 481-8 (2016)
- 604 6. Xicota, L. et al, Association of APOE-Independent Alzheimer Disease Polygenic Risk
- 605 Score With Brain Amyloid Deposition in Asymptomatic Older Adults. *Neurology* **99**,
- 606 e462–75 (2022)
- 607 7. Sleegers, K. et al, A 22-single nucleotide polymorphism Alzheimer's disease risk
- 608 score correlates with family history, onset age, and cerebrospinal fluid A $\beta$ 42.
- 609 *Alzheimers Dement.* **11**, 1452-1460 (2015)
- 610 8. Hong, S. et al, Genome-wide association study of Alzheimer's disease CSF
- 611 biomarkers in the EMIF-AD Multimodal Biomarker Discovery dataset. *Transl.*
- 612 *Psychiatry.* **10**, 403 (2020)
- 613 9. Clark, K. et al, Polygenic Risk Scores in Alzheimer's Disease Genetics: Methodology,
- 614 Applications, Inclusion, and Diversity. *J. Alzheimers Dis.* **89**, 1-12 (2022)
- 615 10. Sariya, S. et al, Polygenic Risk Score for Alzheimer's Disease in Caribbean
- 616 Hispanics. *Ann. Neurol.* **90** 366-376 (2021)
- 617 11. Jung, S.H. et al, Transferability of Alzheimer Disease Polygenic Risk Score Across
- 618 Populations and Its Association With Alzheimer Disease-Related Phenotypes. *JAMA*
- 619 *Netw. Open.* **5**, e2247162 (2022)
- 620 12. Bellenguez, C. et al, New insights into the genetic etiology of Alzheimer's disease and
- 621 related dementias. *Nat. Genet.* **54**, 412-436 (2022)
- 622 13. Jansen, I.E. et al, Genome-wide meta-analysis for Alzheimer's disease cerebrospinal
- 623 fluid biomarkers. *Acta Neuropathol.* **144**, 821-842 (2022)
- 624 14. Logue, M.W. Et al. Genetics of Alzheimer's Disease in the African American
- 625 Population. *J. Clin. Med.* **12**, 5189 (2023)
- 626 15. Miyashita, A. et al, Genetics of Alzheimer's disease: an East Asian perspective. *J*
- 627 *Hum. Genet.* **68**, 115-124 (2023)
- 628 16. Dalmaso MC, et al, First GWAS on Alzheimer's Disease in Argentina and Chile
- 629 populations. medRxiv, doi.10.1101/2023.01.16.23284609
- 630 17. Hollingworth, P; et al, Common variants at ABCA7, MS4A6A/MS4A4E, EPHA1, CD33
- 631 and CD2AP are associated with Alzheimer's disease. *Nat. Genet.* **43**, 429-435 (2011)
- 632 18. Naj, A.C. et al, Common variants at MS4A4/MS4A6E, CD2AP, CD33 and EPHA1 are
- 633 associated with late-onset Alzheimer's disease. *Nat. Genet* **43**,436-41 (2011)
- 634 19. Campbell, M.C. Et al, African genetic diversity: implications for human demographic
- 635 history, modern human origins, and complex disease mapping. *Annu. Rev. Genomics*
- 636 *Hum. Genet.* **9**, 403-33 (2008)
- 637 20. Taliun, D. et al, Sequencing of 53,831 diverse genomes from the NHLBI TOPMed
- 638 Program. *Nature* **590**, 290-299 (2021)
- 639 21. Byrska-Bishop, M. et al, High-coverage whole-genome sequencing of the expanded
- 640 1000 Genomes Project cohort including 602 trios. *Cell* **185**, 3426-3440 (2022)
- 641 22. Reitz, C. et al, Alzheimer Disease Genetics Consortium. Variants in the ATP-binding
- 642 cassette transporter (ABCA7), apolipoprotein E  $\epsilon$ 4, and the risk of late-onset
- 643 Alzheimer disease in African Americans. *JAMA* **309**, 1483-92 (2013)
- 644 23. Kunkle, B.W. et al, Novel Alzheimer Disease Risk Loci and Pathways in African
- 645 American Individuals Using the African Genome Resources Panel: A Meta-analysis.
- 646 *JAMA Neurol.* **78**, 102-113 (2021)



- 647 24. Sherva, R. et al, African ancestry GWAS of dementia in a large military cohort  
648 identifies significant risk loci. *Mol. Psychiatry* **28**, 1293-1302 (2023)
- 649 25. Choi, SW. et al, Tutorial: a guide to performing polygenic risk score analyses. *Nat.*  
650 *Protoc.* **15**, 2759-2772 (2020)
- 651 26. Wand, H. et al, Improving reporting standards for polygenic scores in risk prediction  
652 studies. *Nature* **591**, 211-219 (2021)
- 653 27. Khan, A. et al, Genome-wide polygenic score to predict chronic kidney disease  
654 across ancestries. *Nat. Med.* **28**, 1412-1420 (2022)
- 655 28. Rajabli, F. et al, Ancestral origin of ApoE  $\epsilon$ 4 Alzheimer disease risk in Puerto Rican  
656 and African American populations. *PLoS Genet.* **14**, e1007791 (2018)
- 657 29. Bussies, P.L., et al, Use of local genetic ancestry to assess TOMM40-523' and risk  
658 for Alzheimer disease. *Neurol. Genet.* **6**, e404 (2020)
- 659 30. Nuytemans, K. et al, Identifying differential regulatory control of APOE  $\epsilon$ 4 on African  
660 versus European haplotypes as potential therapeutic targets. *Alzheimers Dement.* **18**,  
661 1930-1942 (2022)
- 662 31. Rajabli, F. et al, A locus at 19q13.31 significantly reduces the ApoE  $\epsilon$ 4 risk for  
663 Alzheimer's Disease in African Ancestry. *PLoS Genet.* **18**, e1009977 (2022)
- 664 32. Frisoni, GB. et al, The probabilistic model of Alzheimer disease: the amyloid  
665 hypothesis revised. *Nat. Rev. Neurosci.* **23**, 53-66 (2022)
- 666

## 667 **METHODS Online**

668

### 669 **GRS computation**

670 GRS<sup>ALZ</sup> includes the 83 independent signals associated with AD. GRS<sup>ALZinclAPOE</sup> have two  
671 additional SNPs to the list of 83: rs7412, rs429358, encoding APOE ε2 and APOE ε4 and  
672 GRS<sup>APOE</sup> includes only the SNPs rs7412 and rs429358. The formula used to calculate the  
673 different GRSs is as follow:

$$\text{GRS}_{\text{sample}} = \sum_{i=1}^{83} (\beta_i * \text{dosage}_{i, \text{sample}}) * \text{Nvariants} / \sum \beta$$

674

675 Where dosage<sub>i</sub> is the risk allele dosage or genotype of variant<sub>i</sub>. β<sub>i</sub> is extracted from stage II  
676 meta-analysis summary statistics (including the ADGC, CHARGE and FinnGen data), at the  
677 exception of APOE variants, where the β<sub>i</sub> are extracted from the summary statistics of the  
678 last UK Biobank's GWAS (unpublished data). The last multiplication term is the number of  
679 variants divided by the sum of βs. Thanks to this term, one unit of this transformed GRS  
680 corresponds to one additional risk allele<sup>33</sup>.

681

### 682 **Sample and variant Quality controls**

683 To have a complete independence of the βs extracted from summary statistics, all samples  
684 from ADGC, CHARGE and FinnGen GWASes were filtered out. After meeting the classical  
685 GWAS gold standard of sample quality control, each sample was included in the analyses<sup>34</sup>.  
686 If a variant dose, covariate, or discordance between imputed and genotyped (if available)  
687 APOE status was observed, the sample was discarded. After QC, a demographic description  
688 of each study is shown in Supplementary Table 1.

689 In case of genotyping data, if the variants are genotyped, they should meet the gold standard  
690 of GWAS variant QC<sup>34</sup>. All the studies were also imputed with the TOPmed reference  
691 panel<sup>35,36</sup>, at the exception of the Korean one, which was imputed with the Haplotype  
692 Reference Consortium imputation panel<sup>37</sup>. If the variants were imputed, variants with a Rsq  
693 below 0.3 were excluded. In case of WGS data, only variants passing the WGS QC are kept  
694 (see supplementary information for ADSP and China sample)(Supplementary Table 2). The  
695 global ancestry of each individual in ADSP and MVP was determined with SNPweights  
696 v.2.1<sup>38</sup> (see supplementary information).

697

### 698 **European mega-analysis methods**

699 For the mega-analysis of European countries, we merged samples from 5 datasets : EADB-  
700 core, GERAD, EADI, Demgene and Bonn. To adjust for population structure, we computed  
701 principal components using the following procedure. From the 146,705 variants used in the  
702 principal component analysis of EADB-core<sup>39</sup>, we extracted from this list, TOPMed imputed  
703 variants having an imputation quality ≥0.9 in each dataset, resulting in 91,353 variants. Then,  
704 we put any genotype to missing if none of the genotype probabilities was higher than 0.8.  
705 Finally, we merged all datasets and removed variants having a proportion of missing  
706 genotypes higher than 0.02 leading to 90,471 variants used for the principal component  
707 analysis. This analysis was performed by flashPCA2. Analyses were adjusted for the 14 firsts  
708 principal components, the genotyping chip and center.

709

### 710 **Statistical analyses**

711 The association of AD status with the GRSs was tested with different models, named  
712 according to the GRS and covariates included in the logistic regression (see supplementary  
713 Table 1 for covariates).

714 - Model GRS<sup>ALZ</sup>: AD ~ GRS<sup>ALZ</sup> + COV

- 715 - Model  $GRS^{ALZadjAPOE}$ :  $AD \sim GRS^{ALZ} + COV + \text{number of } APOE \epsilon 2 \text{ alleles} + \text{number of}$   
716  $APOE \epsilon 4 \text{ alleles}$   
717 - Model  $GRS^{ALZinclAPOE}$ :  $AD \sim GRS^{ALZinclAPOE} + COV$   
718 - Model  $GRS^{APOE}$ :  $AD \sim GRS^{APOE} + COV$   
719

## 720 **Quantile or Percentile analyses**

721 Depending on the value of their GRS, the samples were divided into the reference group or  
722 one of the test groups. In the mega-analysis, the reference group corresponded to the 40-  
723 60% percentile and was tested across each percentile (0-2%, 2-5%, 5-10%, 10-20%, 20-  
724 40%, 60-80%, 80-90%, 95-98%, 98-100%). In the *APOE* stratified analysis, the reference  
725 group was defined by the 40-60% percentile and was tested across quantile (0-20%, 20-  
726 40%, 60-80%, 80-100%). In the multi-ancestry analyses, the reference group was defined by  
727 the 40-60% percentile and was also tested across quantile (0-20%, 20-40%, 60-80%, 80-  
728 100%). These analyses were performed by population and then meta-analyzed per ancestry,  
729 using the inverse variance method, implemented in METAL<sup>40</sup>. To note, Indian, North-Africa  
730 and sub-Saharan Africa populations were excluded because of their small sample size.

- 731 - Model  $GRS^{ALZ}$ :  $AD \sim \text{Group}_{0/1}(GRS^{ALZ}) + COV$   
732 - Model  $GRS^{ALZadjAPOE}$ :  $AD \sim \text{Group}_{0/1}(GRS^{ALZ}) + COV + \text{number of } APOE \epsilon 2 \text{ alleles} +$   
733  $\text{number of } APOE \epsilon 4 \text{ alleles}$   
734 - Model  $GRS^{ALZinclAPOE}$ :  $AD \sim \text{Group}_{0/1}(GRS^{ALZinclAPOE}) + COV$   
735

## 736 **References**

- 737 33. Chouraki, V. et al. Evaluation of a genetic risk score to improve risk prediction for Alzheimer's  
738 disease. *J. Alzheimers Dis.* **53**, 921–932 (2016).  
739 34. Bellenguez, C. et al. New insights into the genetic etiology of Alzheimer's disease and related  
740 dementias. *Nat. Genet.* **54**, 412-436 (2022)  
741 35. Taliun, D. et al. Sequencing of 53,831 diverse genomes from the NHLBI TOPMed Program.  
742 *Nature* **590**, 290–299 (2021).  
743 36. Das, S. et al. Next-generation genotype imputation service and methods. *Nat. Genet.* **48**,  
744 1284–1287 (2016).  
745 37. McCarthy, S. et al. A reference panel of 64,976 haplotypes for genotype imputation. *Nat.*  
746 *Genet.* **48**, 1279–1283 (2016).  
747 38. Chen, C.Y. et al. Improved ancestry inference using weights from external reference panels.  
748 *Bioinformatics* **2**, 1399-406 (2013).  
749 39. Abraham, G. et al. FlashPCA2: principal component analysis of Biobank-scale genotype  
750 datasets. *Bioinformatics* **33**, 2776-2778 (2017).  
751 40. Willer, C. J., Li, Y. & Abecasis, G. R. METAL: fast and efficient meta-analysis of genomewide  
752 association scans. *Bioinformatics* **26**, 2190–1 (2010).  
753

## 754 **Data Availability**

755 ADSP: <https://dss.niagads.org/datasets/ng00067/>

756

## 757 **Code availability**

758 Code are available upon requests

759

760

761

762

763

764

765 **Table 1. Association of GRS<sup>ALZadjAPOE</sup> with AD, AD and related dementia (ADRD) and**  
766 **dementia in MVP.**

| Ancestry          | Disease  | Ncases | Ncontrols | GRS <sup>ALZadjAPOE</sup> |           |                         |
|-------------------|----------|--------|-----------|---------------------------|-----------|-------------------------|
|                   |          |        |           | OR                        | 95% CI    | P-value                 |
| European American | AD       | 4,561  |           | 1.10                      | 1.09-1.11 | 1.73x10 <sup>-88</sup>  |
|                   | ADRD     | 17,519 | 84,587    | 1.06                      | 1.06-1.07 | 1.94x10 <sup>-111</sup> |
|                   | Dementia | 26,473 |           | 1.05                      | 1.04-1.05 | 5.82x10 <sup>-83</sup>  |
| US LA Ancestry    | AD       | 375    |           | 1.07                      | 1.04-1.11 | 1.47x10 <sup>-5</sup>   |
|                   | ADRD     | 1,527  | 7,166     | 1.02                      | 1.00-1.04 | 1.27x10 <sup>-2</sup>   |
|                   | Dementia | 1,981  |           | 1.02                      | 1.00-1.03 | 2.22x10 <sup>-2</sup>   |
| African American  | AD       | 713    |           | 1.05                      | 1.03-1.08 | 5.38x10 <sup>-6</sup>   |
|                   | ADRD     | 4,016  | 19,405    | 1.02                      | 1.01-1.02 | 9.29x10 <sup>-4</sup>   |
|                   | Dementia | 4,702  |           | 1.02                      | 1.01-1.03 | 8.84x10 <sup>-4</sup>   |

767  
768



769 **Figure 1: Association of (A)  $GRS^{alz}$  and (B)  $GRS^{ALZadjAPOE}$  with the risk of developing AD**  
770 **in 15 European countries.** Ncase, number of cases; Ncontrols, number of controls; OR,  
771 Odds ratio. The lines in the Forrest plots indicate the 95% confidence interval for the ORs.  
772

773 **Figure 2: Relation between the different GRSs and APOE status on the risk of**  
774 **developing AD. (A)** Risk of developing AD according to GRS strata (0-2%, 2-5%, 10-20%,  
775 20-40%, 60-80%, 80-90%, 90-95%, 95-98%, 98-100%) for  $GRS^{ALZ}$ ,  $GRS^{ALZadjAPOE}$  and  
776  $GRZ^{ALZInclAPOE}$ . The 40-60% GRS stratum was used as the reference; **(B)** Risk of developing  
777 AD according to  $GRS^{ALZ}$  strata (0-20%, 20-40%, 60-80% and 80-100%) and to the APOE  
778 genotype by grouping together the  $\epsilon 2/\epsilon 2/\epsilon 3$ ,  $\epsilon 3/\epsilon 3$ ,  $\epsilon 2/\epsilon 4/\epsilon 3/\epsilon 4$ ,  $\epsilon 4/\epsilon 4$  carriers. The 40-60%  
779 GRS stratum was used as the reference.  
780

781 **Figure 3: Association of (A)  $GRS^{alz}$  and (B)  $GRS^{ALZadjAPOE}$  with the level of A $\beta$ 42, Tau**  
782 **and p-TAU in the cerebrospinal fluid in European-ancestry populations.** Ncase, number  
783 of cases; Ncontrols, number of controls, OR, Odds ratio. The lines in the Forrest plots  
784 indicate the 95% confidence interval for the ORs.  
785

786 **Figure 4: World map showing the populations analysed.** A colour gradient indicates the  
787 magnitude of the association of APOE  $\epsilon 2/\epsilon 3/\epsilon 4$  alleles with the risk of developing AD in  
788 different countries (all values are shown in Supplementary Table 5).  
789

790 **Figure 5: Association of (A)  $GRS^{alz}$  and (B)  $GRS^{ALZadjAPOE}$  with the risk of developing AD**  
791 **in multi-ancestry populations.** Ncase, number of cases; Ncontrols, number of controls; OR,  
792 Odds ratio. The lines in the Forrest plots indicate the 95% confidence interval for the ORs.  
793 African-American-ancestry (more than 75% AA ancestry) meta-analysis includes MVP and  
794 ADSP. East-Asia meta-analysis includes China, Korea and Japan. Latino-American ancestry  
795 (self-reporting) meta-analysis includes MMVP, ADSP and Salsa. South-America meta-  
796 analysis includes Argentina, Brazil, Chile and Colombia.  
797

798 **Figure 6: Risk of developing AD according to GRS ( $GRS^{ALZ}$ ,  $GRS^{ALZadjAPOE}$  and**  
799  **$GRZ^{ALZInclAPOE}$ ) strata (0-20%, 20-40%, 60-80% and 80-100%) in multi-ancestry**  
800 **populations.** Ncase, number of cases; Ncontrols, number of controls; OR, Odds ratio. The  
801 lines in the Forrest plots indicate the 95% confidence interval for the ORs. The 40-60% GRS  
802 stratum was used as the reference in each population and results were meta-analyzed.  
803 African-American ancestry meta-analysis includes MVP and ADSP. East-Asia meta-analysis  
804 includes China, Korea and Japan. Latina-American ancestry meta-analysis includes MVP  
805 and ADSP. South-America meta-analysis includes Argentina, Brazil, Chile and Colombia.

**Figure 1**  
**A**

**GRS<sup>ALZ</sup>**  
 $I^2 = 3.9$  ,  $HetP = 4.08e-01$

| Country              | Ncases        | Ncontrols     | OR          | 95% CI             | P-value          |
|----------------------|---------------|---------------|-------------|--------------------|------------------|
| Finland              | 1,118         | 1,770         | 1.08        | [1.08;1.11]        | 3.14e-19         |
| Norway               | 1,327         | 1,179         | 1.13        | [1.10;1.16]        | 6.07e-24         |
| Sweden               | 1,466         | 3,078         | 1.14        | [1.12;1.16]        | 1.60e-42         |
| Denmark              | 398           | 650           | 1.13        | [1.09;1.18]        | 5.29e-10         |
| United Kingdom       | 4,622         | 8,414         | 1.13        | [1.11;1.14]        | 8.78e-85         |
| The Netherlands      | 2,428         | 2,024         | 1.11        | [1.09;1.13]        | 3.80e-28         |
| Belgium              | 1,211         | 1,431         | 1.13        | [1.10;1.16]        | 1.58e-18         |
| Germany              | 2,190         | 3,141         | 1.12        | [1.10;1.14]        | 5.71e-43         |
| Switzerland          | 175           | 372           | 1.07        | [1.01;1.12]        | 1.66e-02         |
| Czech Republic       | 177           | 60            | 1.12        | [1.02;1.25]        | 1.97e-02         |
| Bulgaria/Greece      | 735           | 1,195         | 1.10        | [1.05;1.14]        | 1.44e-05         |
| France               | 3,789         | 9,026         | 1.12        | [1.11;1.13]        | 3.19e-85         |
| Italy                | 2,973         | 1,251         | 1.13        | [1.10;1.15]        | 2.52e-31         |
| Spain                | 3,103         | 1,615         | 1.14        | [1.12;1.16]        | 1.48e-41         |
| Portugal             | 80            | 74            | 1.08        | [0.98;1.18]        | 1.14e-01         |
| <b>Meta-analysis</b> | <b>25,792</b> | <b>35,280</b> | <b>1.12</b> | <b>[1.12;1.13]</b> | <b>1.07e-412</b> |

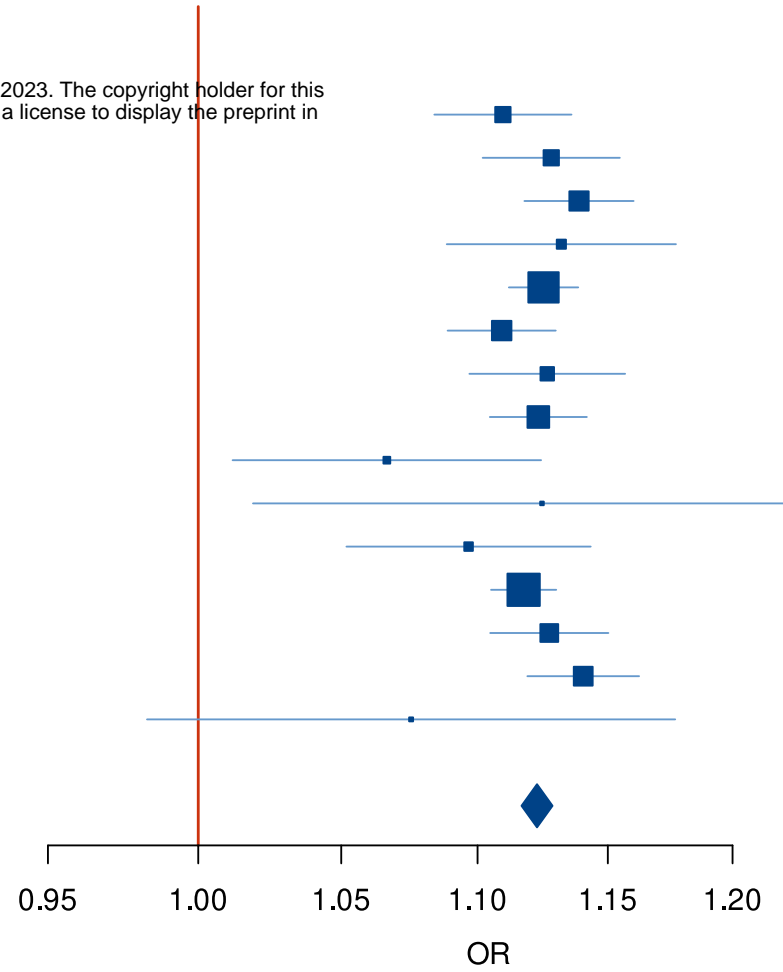

**B**

**GRS<sup>ALZadjAPOE</sup>**  
 $I^2 = 9.2$  ,  $HetP = 3.50e-01$

| Country              | Ncases        | Ncontrols     | OR          | 95% CI             | P-value          |
|----------------------|---------------|---------------|-------------|--------------------|------------------|
| Finland              | 1,118         | 1,770         | 1.10        | [1.08;1.13]        | 2.32e-14         |
| Norway               | 1,327         | 1,179         | 1.13        | [1.10;1.16]        | 8.43e-20         |
| Sweden               | 1,466         | 3,078         | 1.14        | [1.12;1.17]        | 2.27e-37         |
| Denmark              | 398           | 650           | 1.13        | [1.08;1.17]        | 2.08e-08         |
| United Kingdom       | 4,622         | 8,414         | 1.12        | [1.11;1.14]        | 3.13e-73         |
| The Netherlands      | 2,428         | 2,024         | 1.10        | [1.08;1.13]        | 6.50e-24         |
| Belgium              | 1,211         | 1,431         | 1.13        | [1.10;1.16]        | 2.20e-17         |
| Germany              | 2,190         | 3,141         | 1.12        | [1.10;1.14]        | 9.18e-37         |
| Switzerland          | 175           | 372           | 1.06        | [1.01;1.12]        | 2.32e-02         |
| Czech Republic       | 177           | 60            | 1.14        | [1.03;1.27]        | 1.81e-02         |
| Bulgaria/Greece      | 735           | 1,195         | 1.10        | [1.05;1.15]        | 1.52e-05         |
| France               | 3,789         | 9,026         | 1.11        | [1.10;1.13]        | 4.69e-73         |
| Italy                | 2,973         | 1,251         | 1.12        | [1.10;1.15]        | 2.15e-27         |
| Spain                | 3,103         | 1,615         | 1.14        | [1.11;1.16]        | 2.91e-36         |
| Portugal             | 80            | 74            | 1.07        | [0.98;1.18]        | 1.42e-01         |
| <b>Meta-analysis</b> | <b>25,792</b> | <b>35,280</b> | <b>1.12</b> | <b>[1.11;1.13]</b> | <b>2.20e-353</b> |

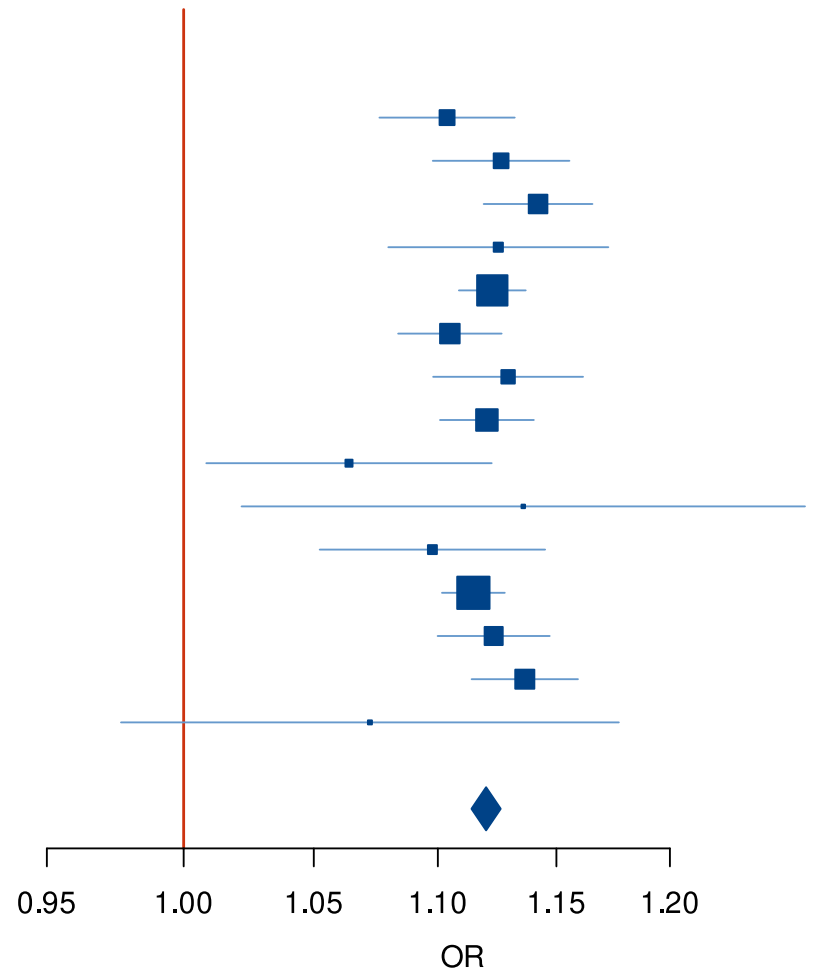

**Figure 2**

**A**

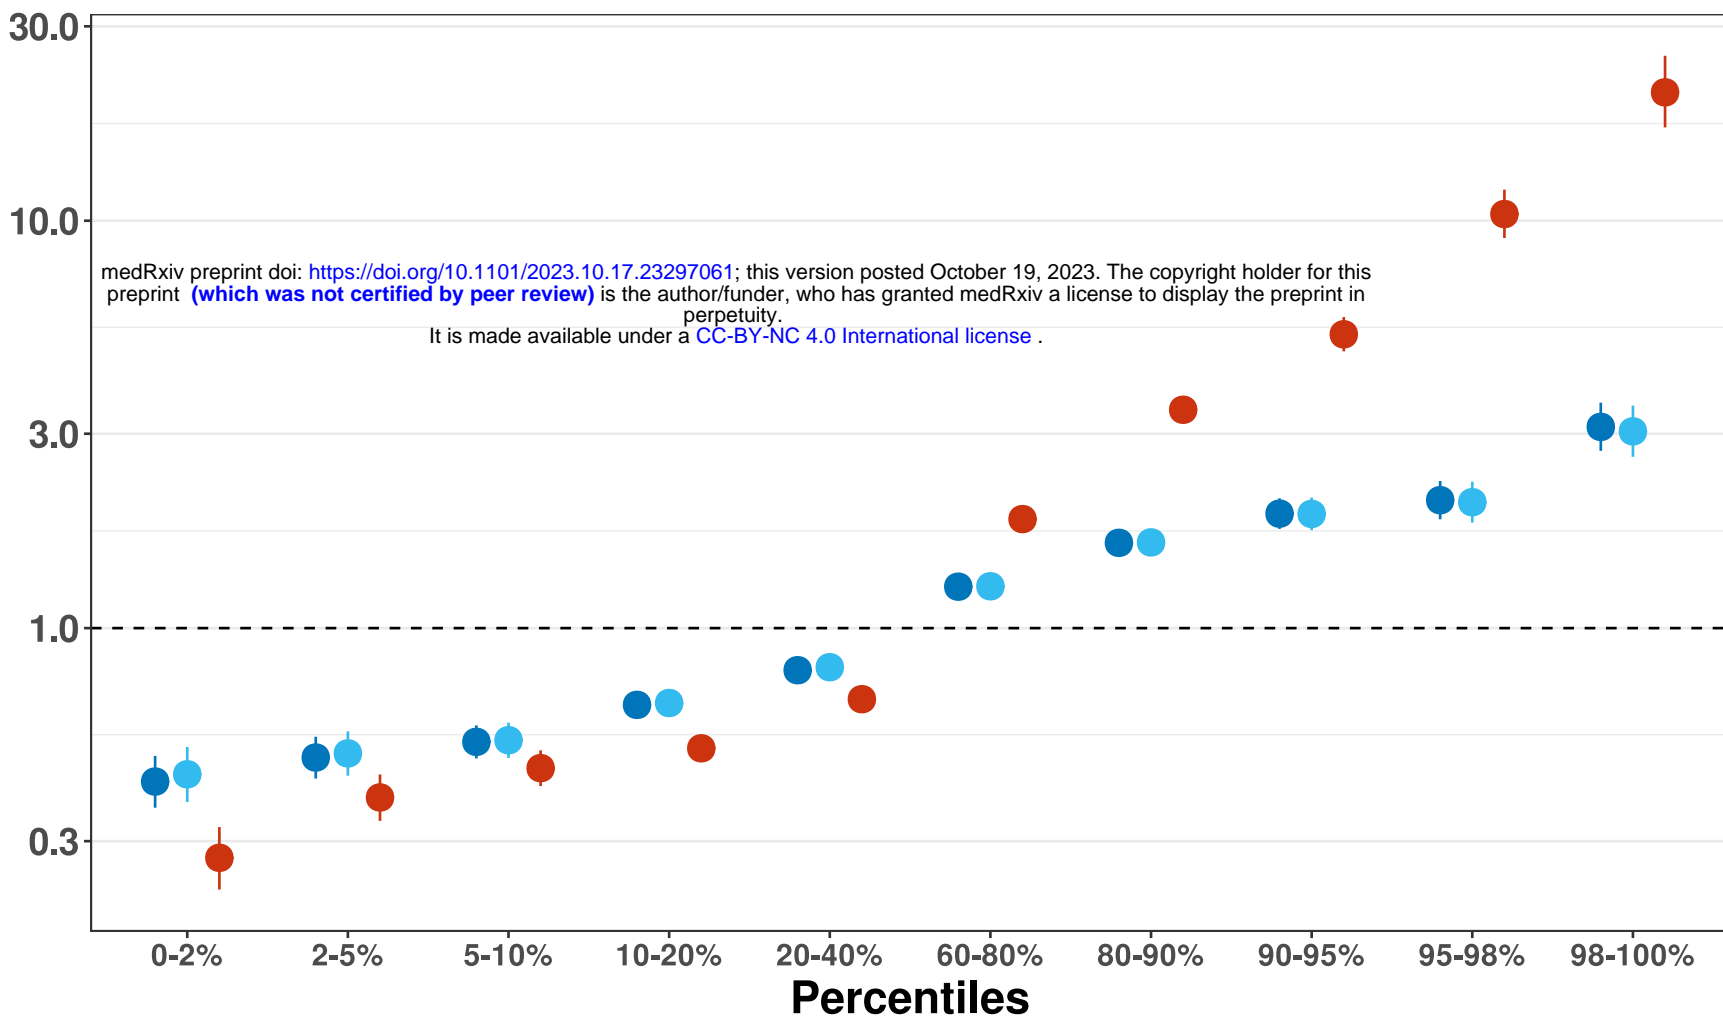

**B**

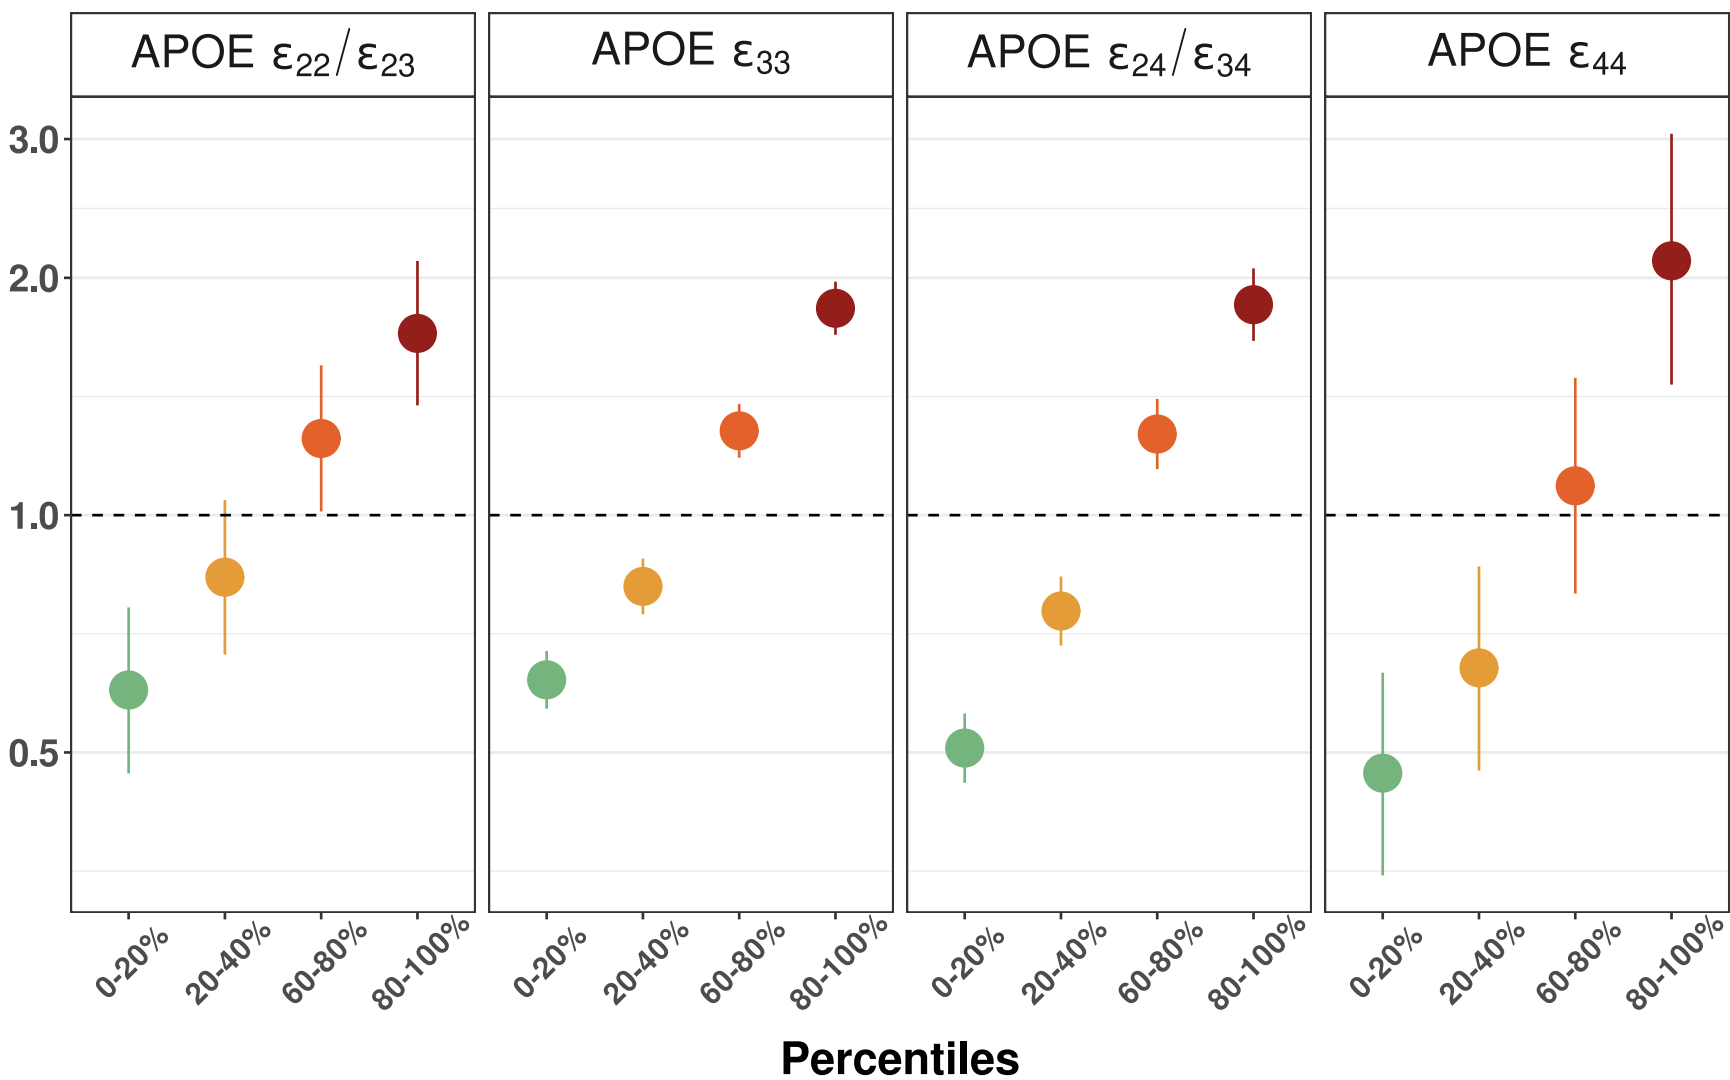

**Percentiles** ● 0-20% ● 20-40% ● 60-80% ● 80-100%

**Figure 3**

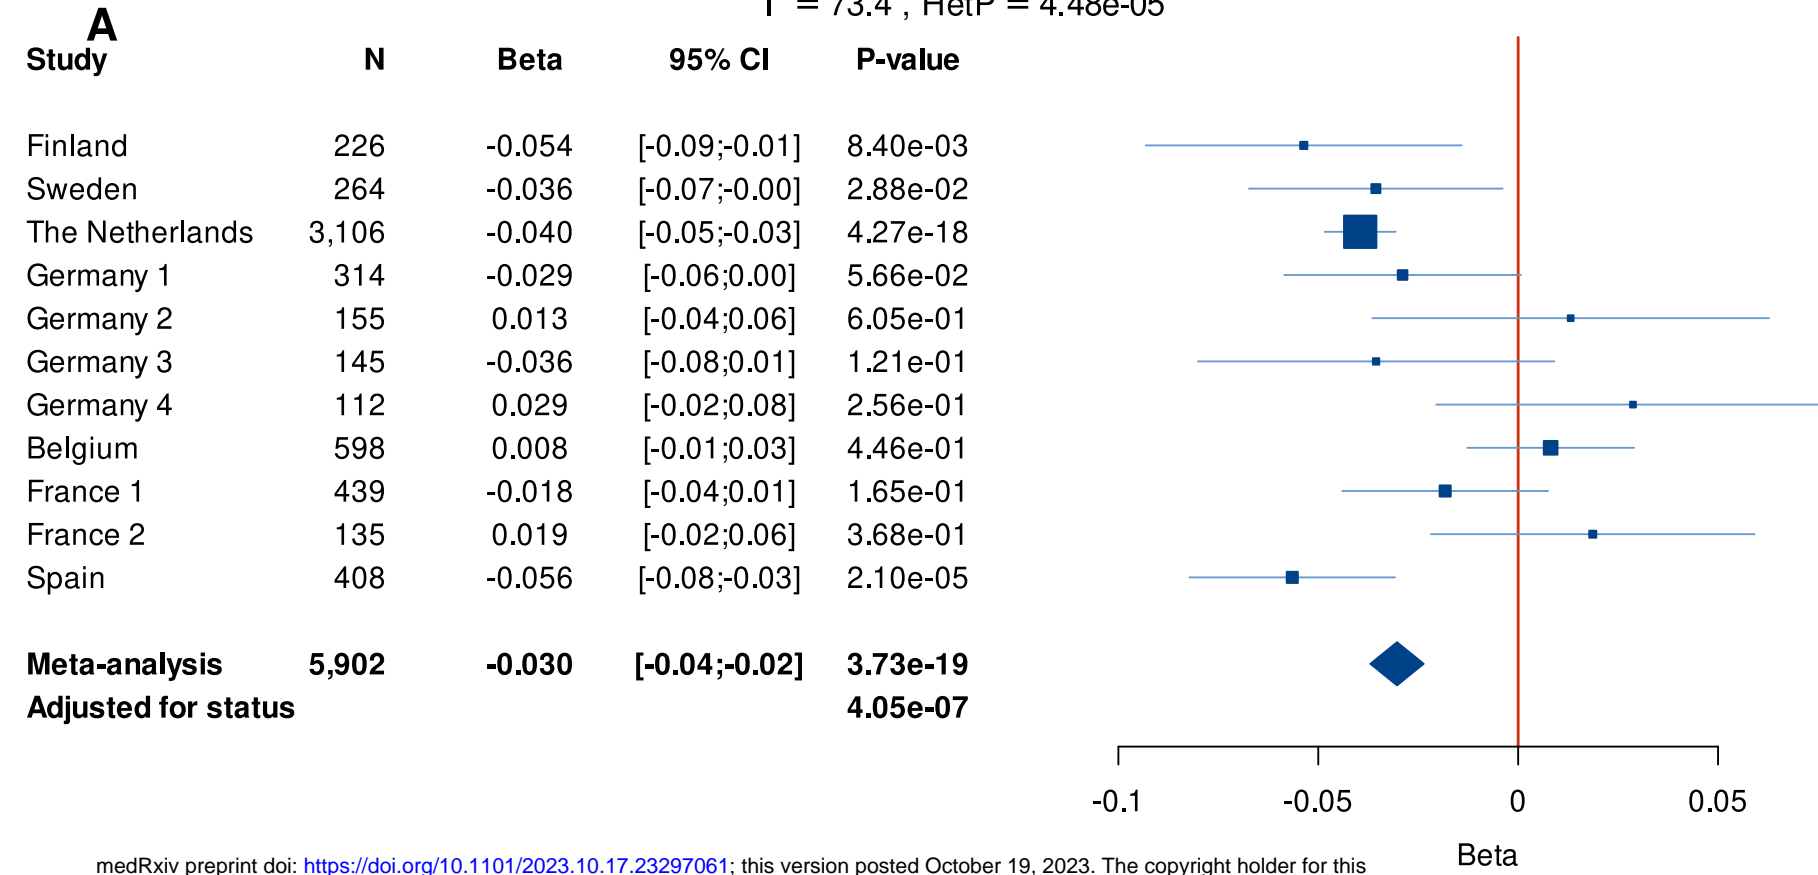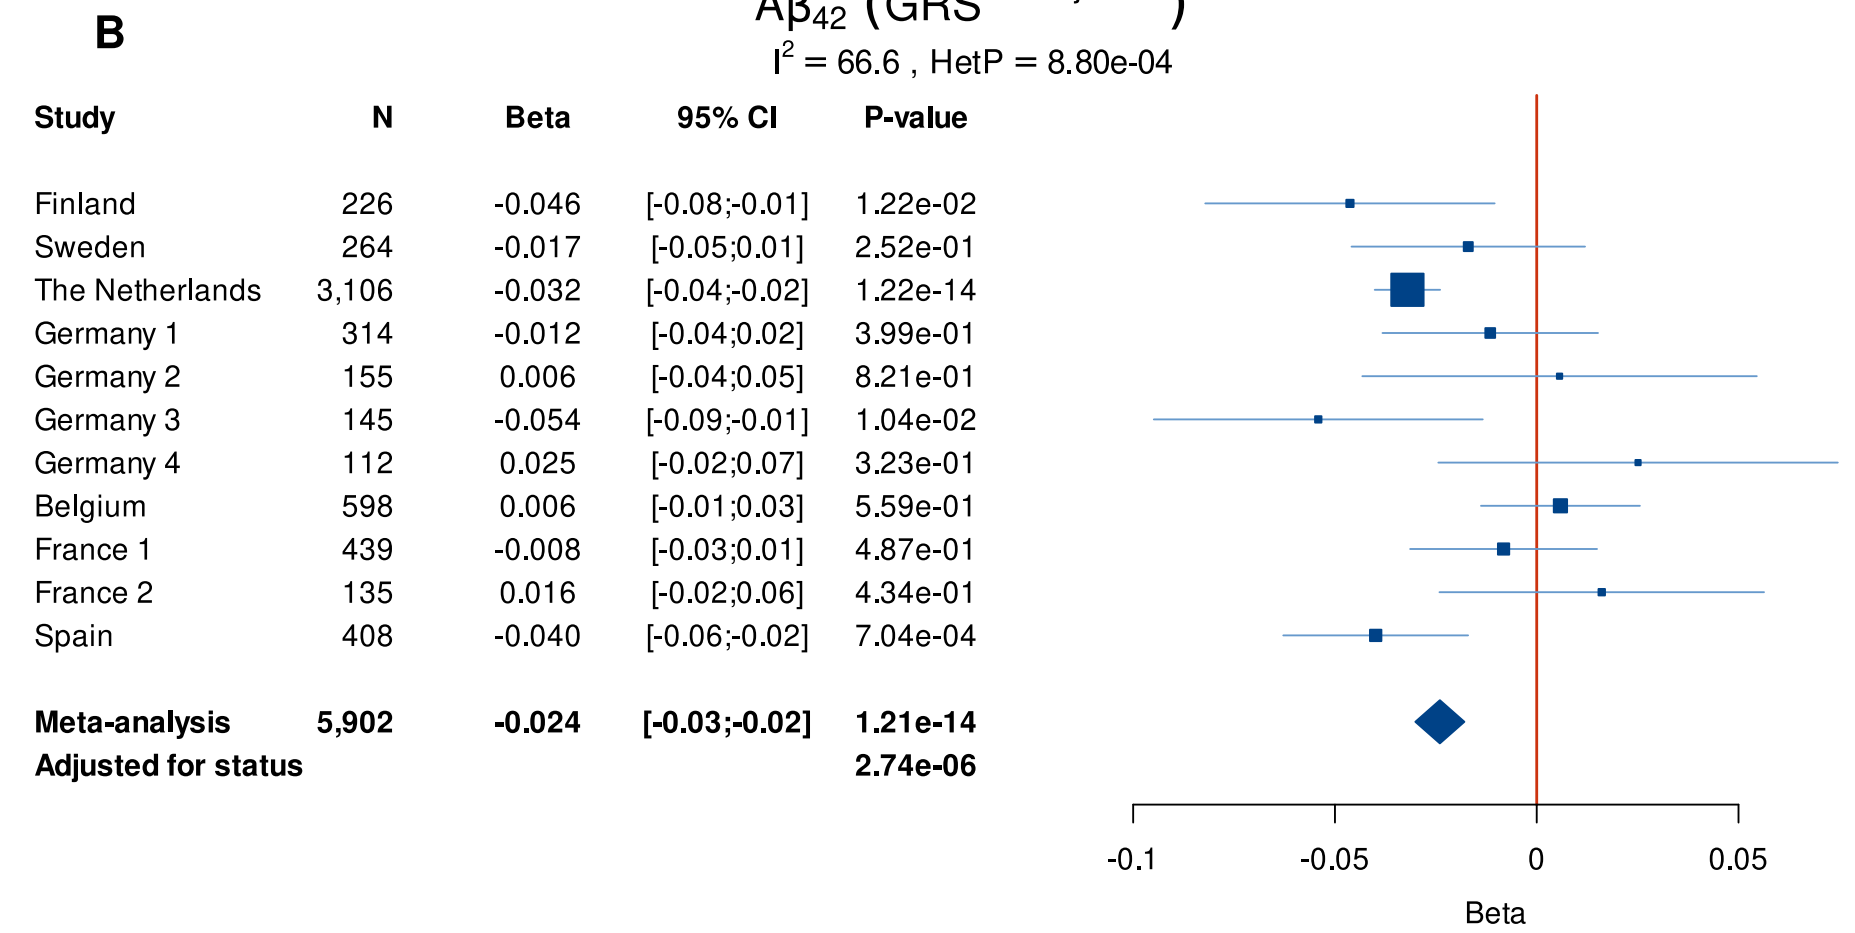

medRxiv preprint doi: <https://doi.org/10.1101/2023.10.17.23297061>; this version posted October 19, 2023. The copyright holder for this preprint (which was not certified by peer review) is the author/funder, who has granted medRxiv a license to display the preprint in perpetuity. It is made available under a [CC-BY-NC 4.0 International license](https://creativecommons.org/licenses/by-nc/4.0/).

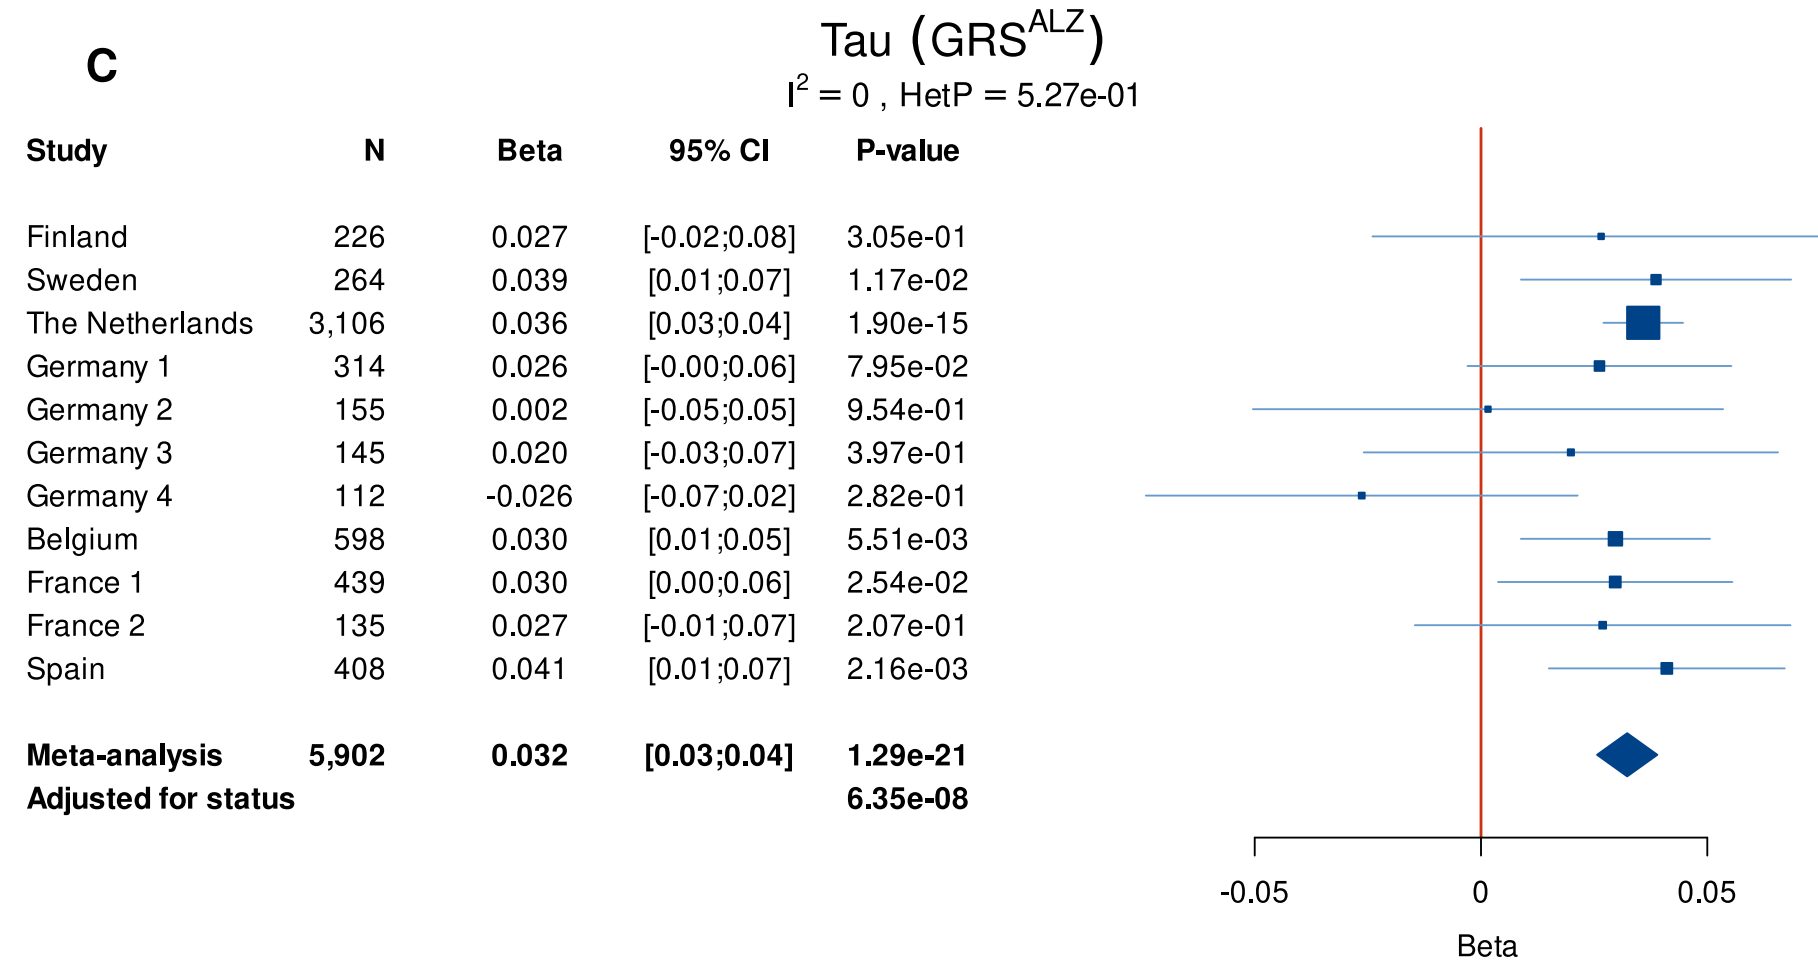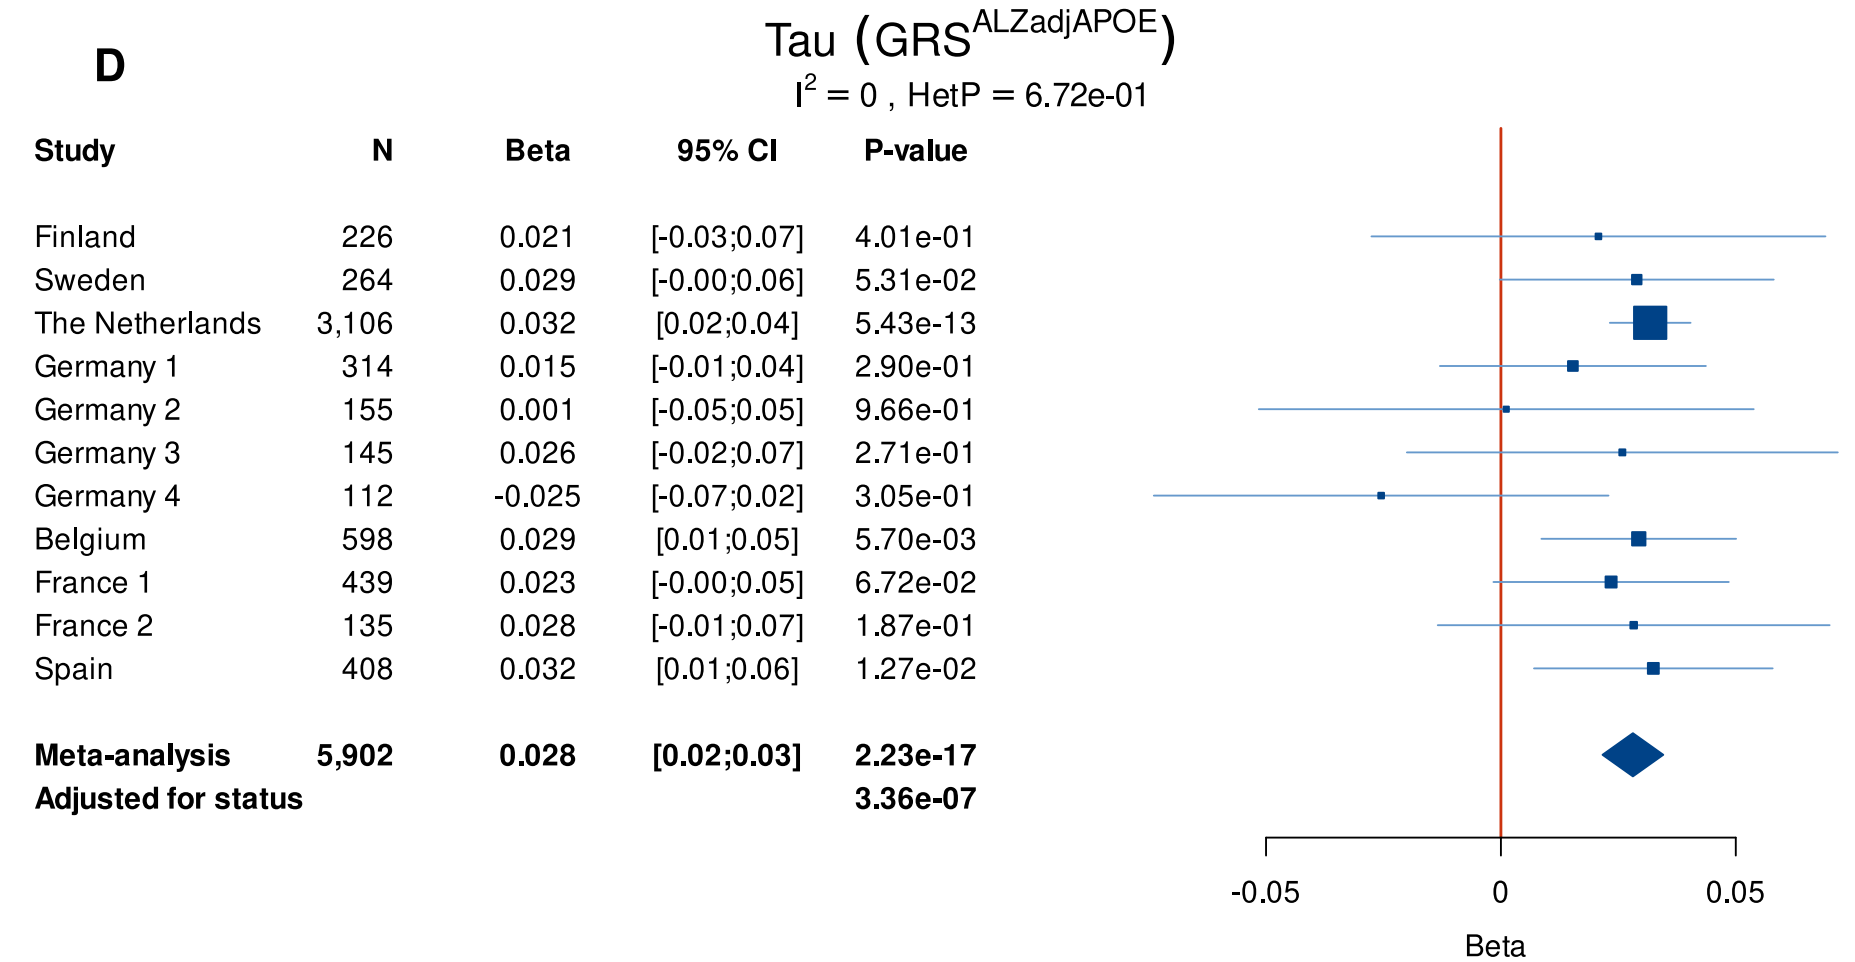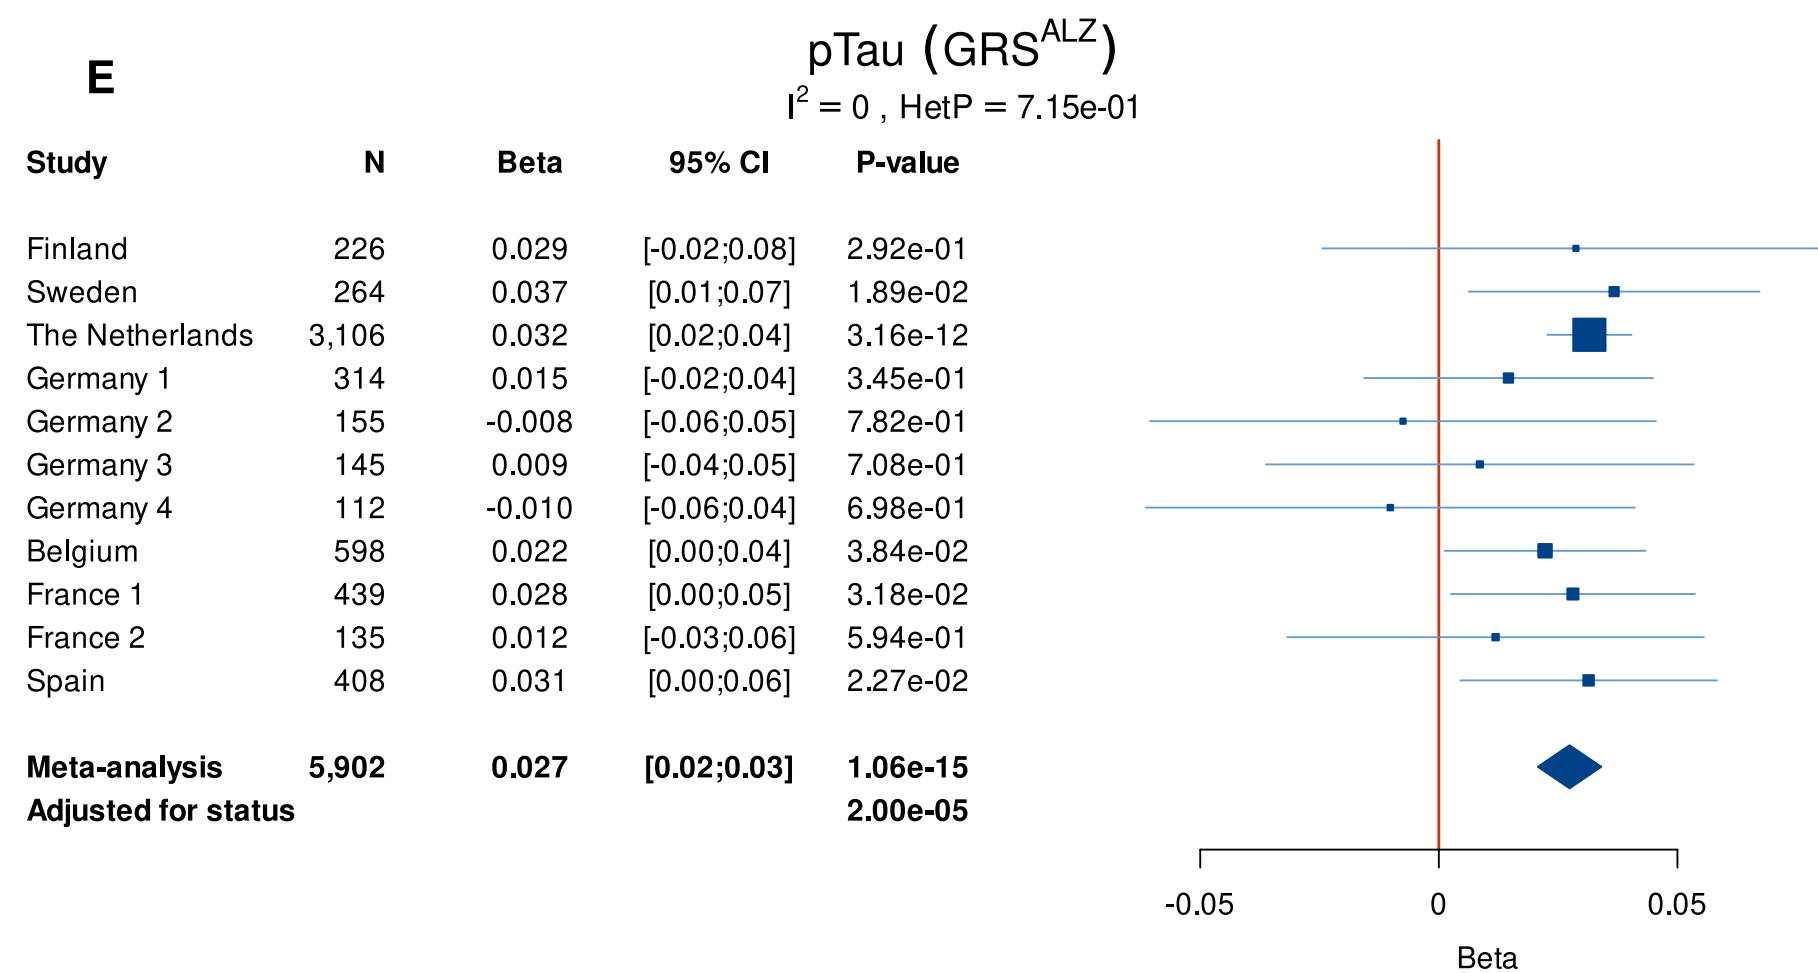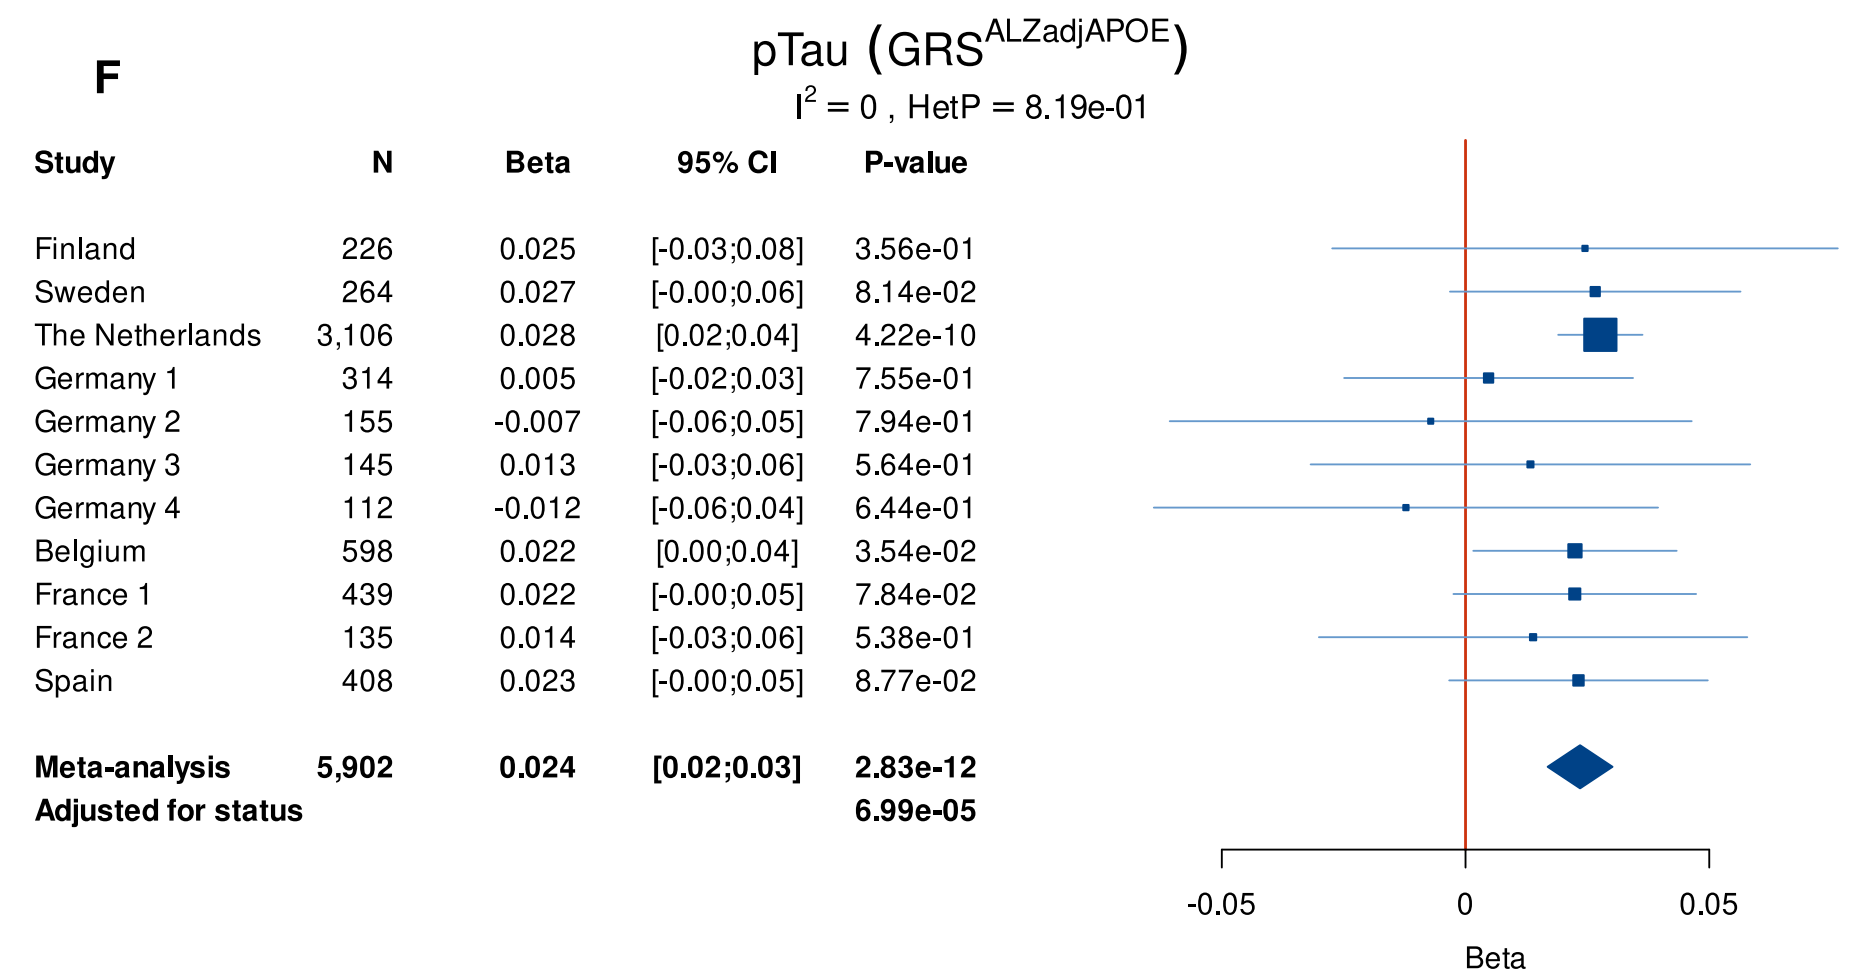



Figure 4

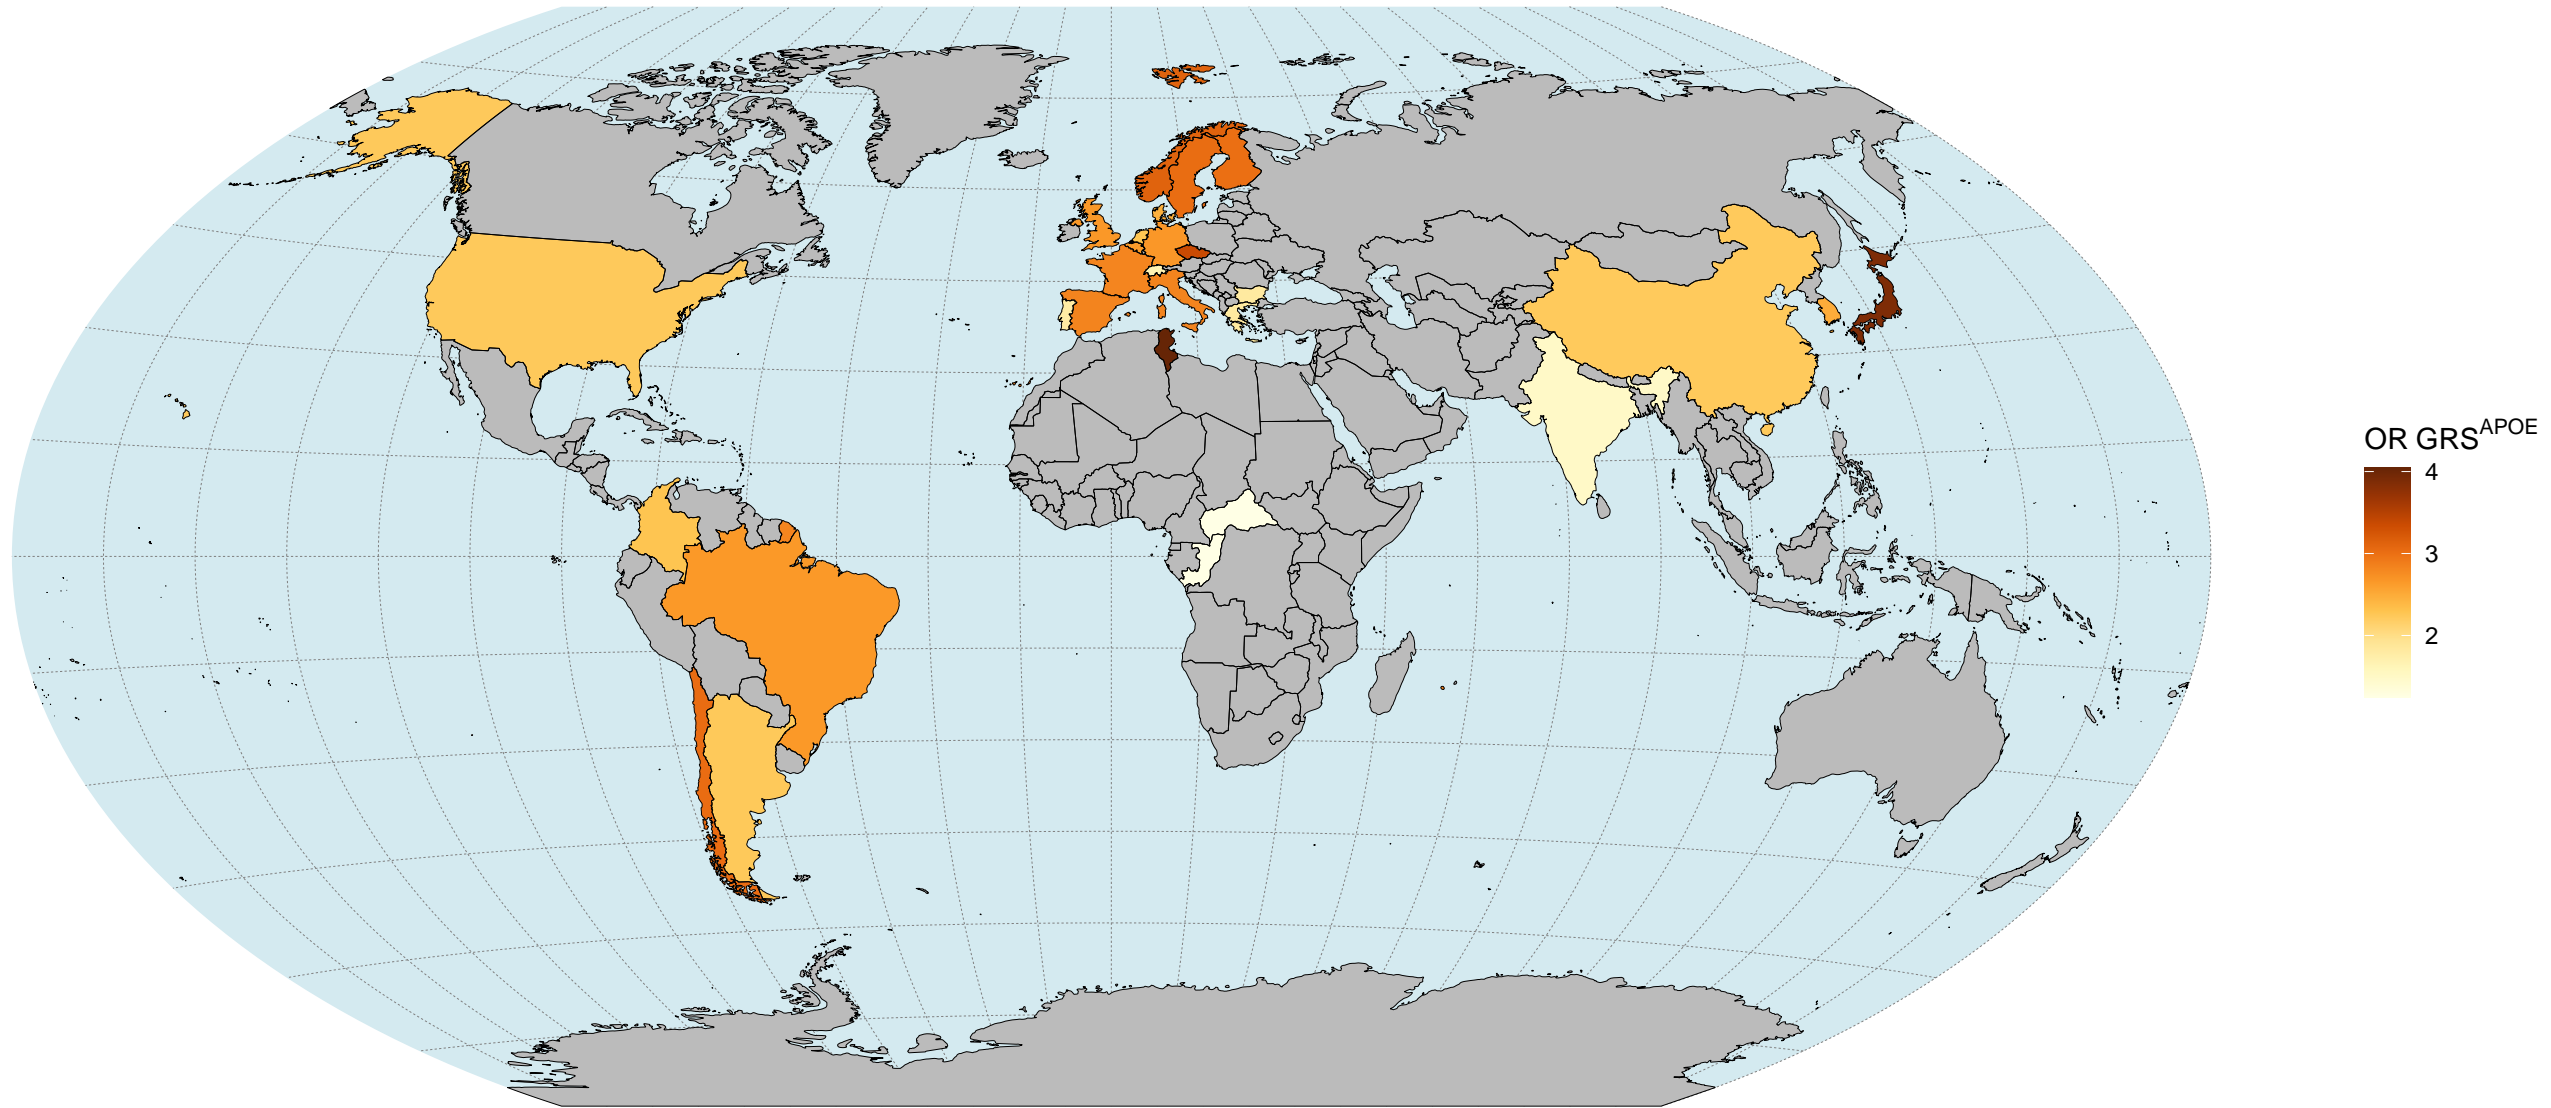

**Figure 5**  
**A**

GRS<sup>ALZ</sup>

| Country                             | Ncases       | Ncontrols     | OR          | 95% CI             | P-value         |
|-------------------------------------|--------------|---------------|-------------|--------------------|-----------------|
| European American MVP               | 4,561        | 84,587        | 1.10        | [1.09;1.11]        | 2.40e-81        |
| Maghreb                             | 58           | 187           | 1.11        | [1.00;1.24]        | 4.81e-02        |
| Sub-Saharan Africa                  | 87           | 1,113         | 1.02        | [0.98;1.07]        | 3.07e-01        |
| African American MVP                | 713          | 19,405        | 1.05        | [1.02;1.07]        | 5.12e-05        |
| African American ADSP               | 1,152        | 2,451         | 1.04        | [1.02;1.06]        | 3.75e-05        |
| <b>Meta-analysis AA Ancestry</b>    | <b>1,865</b> | <b>21,856</b> | <b>1.04</b> | <b>[1.03;1.06]</b> | <b>8.60e-09</b> |
| US LA Ancestry MVP                  | 375          | 7,166         | 1.07        | [1.04;1.11]        | 3.38e-05        |
| US LA Ancestry SALSA                | 79           | 657           | 1.03        | [0.97;1.10]        | 3.36e-01        |
| US LA Ancestry ADSP                 | 1,780        | 2,489         | 1.06        | [1.04;1.07]        | 6.26e-12        |
| Colombia                            | 254          | 241           | 1.07        | [1.01;1.12]        | 1.45e-02        |
| Brazil                              | 301          | 176           | 1.11        | [1.06;1.16]        | 1.39e-05        |
| Argentina                           | 417          | 601           | 1.08        | [1.04;1.12]        | 1.51e-04        |
| Chile                               | 122          | 252           | 1.16        | [1.09;1.24]        | 5.60e-06        |
| <b>Meta-analysis US LA Ancestry</b> | <b>2,234</b> | <b>10,312</b> | <b>1.06</b> | <b>[1.04;1.07]</b> | <b>1.04e-15</b> |
| <b>Meta-analysis South America</b>  | <b>1,094</b> | <b>1,270</b>  | <b>1.09</b> | <b>[1.07;1.12]</b> | <b>1.47e-13</b> |
| <b>Meta-analysis LA Ancestry</b>    | <b>3,328</b> | <b>11,582</b> | <b>1.07</b> | <b>[1.05;1.08]</b> | <b>1.43e-26</b> |
| China                               | 453          | 786           | 1.10        | [1.05;1.14]        | 2.33e-06        |
| Japan                               | 1,756        | 1,865         | 1.09        | [1.06;1.11]        | 2.08e-14        |
| South Korea                         | 1,119        | 1,172         | 1.07        | [1.05;1.09]        | 3.25e-12        |
| <b>Meta-analysis East Asia</b>      | <b>3,328</b> | <b>3,823</b>  | <b>1.08</b> | <b>[1.07;1.10]</b> | <b>1.05e-29</b> |
| India                               | 110          | 1,548         | 1.00        | [0.95;1.05]        | 9.37e-01        |

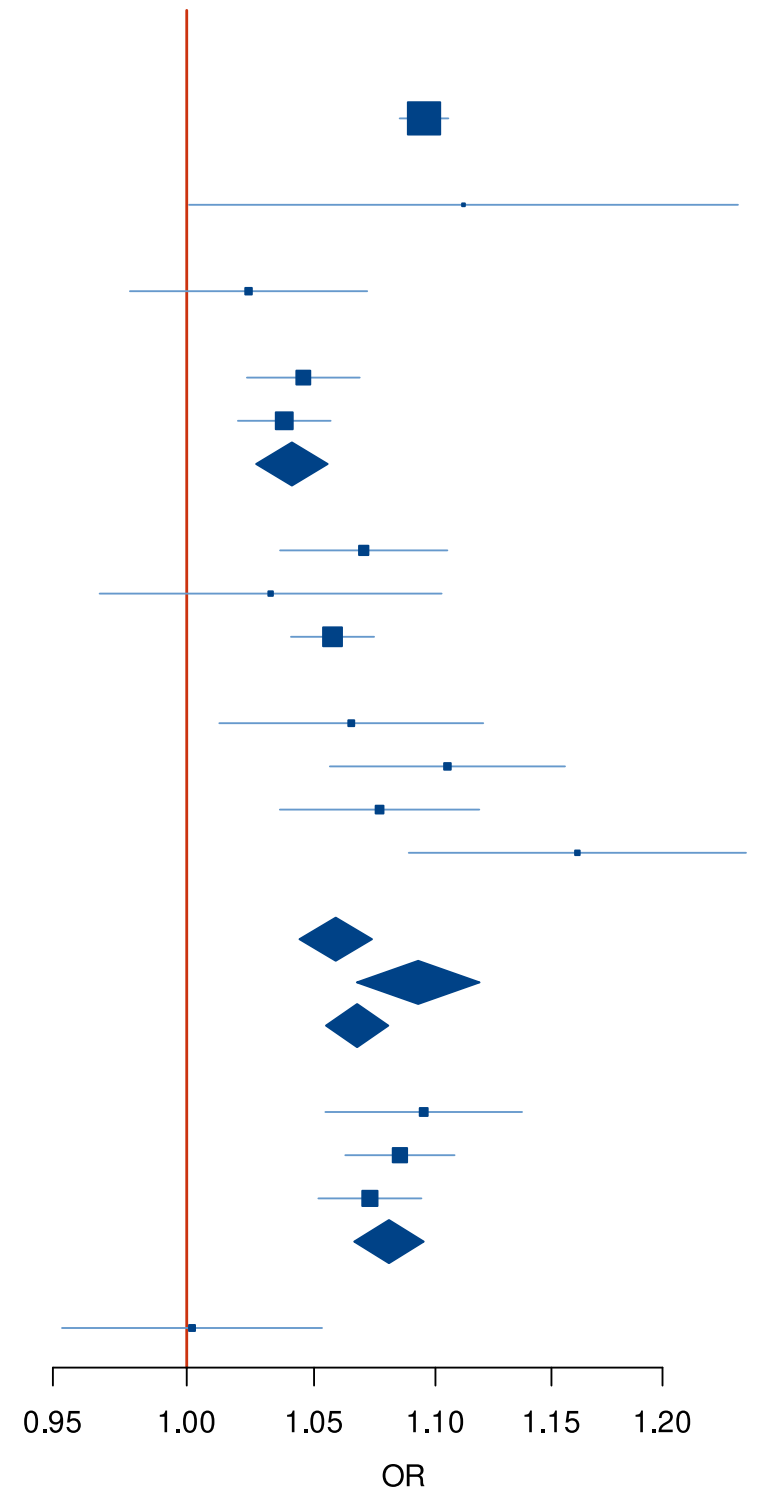

**B**

GRS<sup>ALZadjAPOE</sup>

| Country                             | Ncases       | Ncontrols     | OR          | 95% CI             | P-value         |
|-------------------------------------|--------------|---------------|-------------|--------------------|-----------------|
| European American MVP               | 4,561        | 84,587        | 1.10        | [1.09;1.11]        | 1.73e-88        |
| Maghreb                             | 58           | 187           | 1.10        | [0.99;1.23]        | 9.15e-02        |
| Sub-Saharan Africa                  | 87           | 1,113         | 1.02        | [0.98;1.07]        | 3.38e-01        |
| African American MVP                | 713          | 19,405        | 1.05        | [1.03;1.08]        | 5.38e-06        |
| African American ADSP               | 1,152        | 2,451         | 1.03        | [1.01;1.05]        | 4.25e-04        |
| <b>Meta-analysis AA Ancestry</b>    | <b>1,865</b> | <b>21,856</b> | <b>1.04</b> | <b>[1.03;1.06]</b> | <b>1.86e-08</b> |
| US LA Ancestry MVP                  | 375          | 7,166         | 1.07        | [1.04;1.11]        | 1.47e-05        |
| US LA Ancestry SALSA                | 79           | 657           | 1.03        | [0.97;1.10]        | 3.62e-01        |
| US LA Ancestry ADSP                 | 1,780        | 2,489         | 1.06        | [1.04;1.08]        | 5.14e-12        |
| Colombia                            | 254          | 241           | 1.06        | [1.00;1.11]        | 4.31e-02        |
| Brazil                              | 301          | 176           | 1.11        | [1.06;1.17]        | 7.09e-06        |
| Argentina                           | 417          | 601           | 1.08        | [1.03;1.12]        | 2.54e-04        |
| Chile                               | 122          | 252           | 1.15        | [1.08;1.23]        | 5.96e-05        |
| <b>Meta-analysis US LA Ancestry</b> | <b>2,234</b> | <b>10,312</b> | <b>1.06</b> | <b>[1.05;1.08]</b> | <b>4.75e-16</b> |
| <b>Meta-analysis South America</b>  | <b>1,094</b> | <b>1,270</b>  | <b>1.09</b> | <b>[1.06;1.12]</b> | <b>2.87e-12</b> |
| <b>Meta-analysis LA Ancestry</b>    | <b>3,328</b> | <b>11,582</b> | <b>1.07</b> | <b>[1.06;1.08]</b> | <b>5.84e-26</b> |
| China                               | 453          | 786           | 1.09        | [1.05;1.14]        | 1.12e-05        |
| Japan                               | 1,756        | 1,865         | 1.09        | [1.06;1.11]        | 9.80e-13        |
| South Korea                         | 1,119        | 1,172         | 1.07        | [1.05;1.09]        | 1.47e-10        |
| <b>Meta-analysis East Asia</b>      | <b>3,328</b> | <b>3,823</b>  | <b>1.08</b> | <b>[1.06;1.10]</b> | <b>1.01e-25</b> |
| India                               | 110          | 1,548         | 1.00        | [0.95;1.05]        | 9.02e-01        |

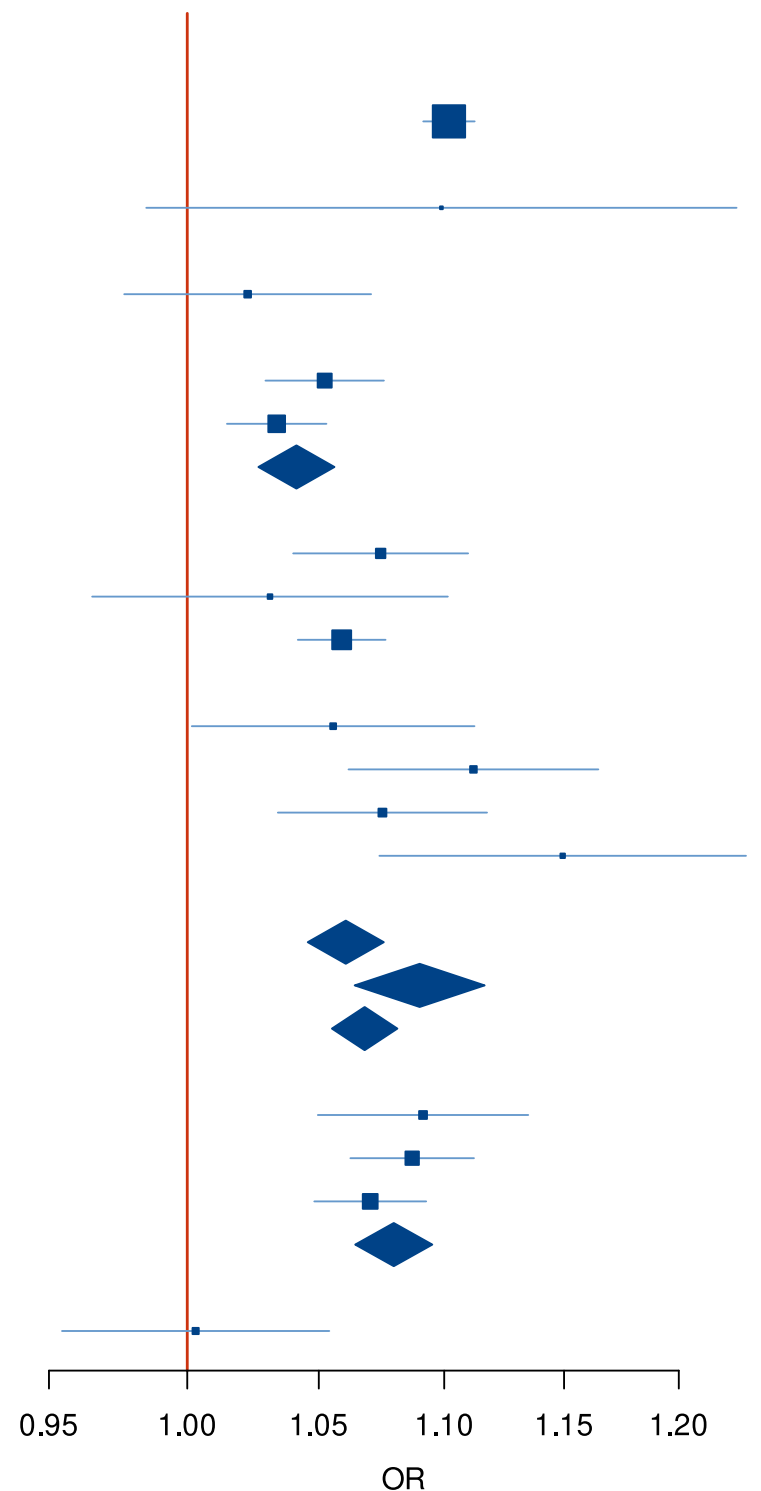

medRxiv preprint doi: <https://doi.org/10.1101/2023.10.19.23297061>; this version posted October 19, 2023. The copyright holder for this preprint (which was not certified by peer review) is the author/funder, who has granted medRxiv a license to display the preprint in perpetuity. It is made available under a [CC-BY-NC 4.0 International license](https://creativecommons.org/licenses/by-nc/4.0/).

**Figure 6**GRS<sup>ALZadjAPOE</sup>**A**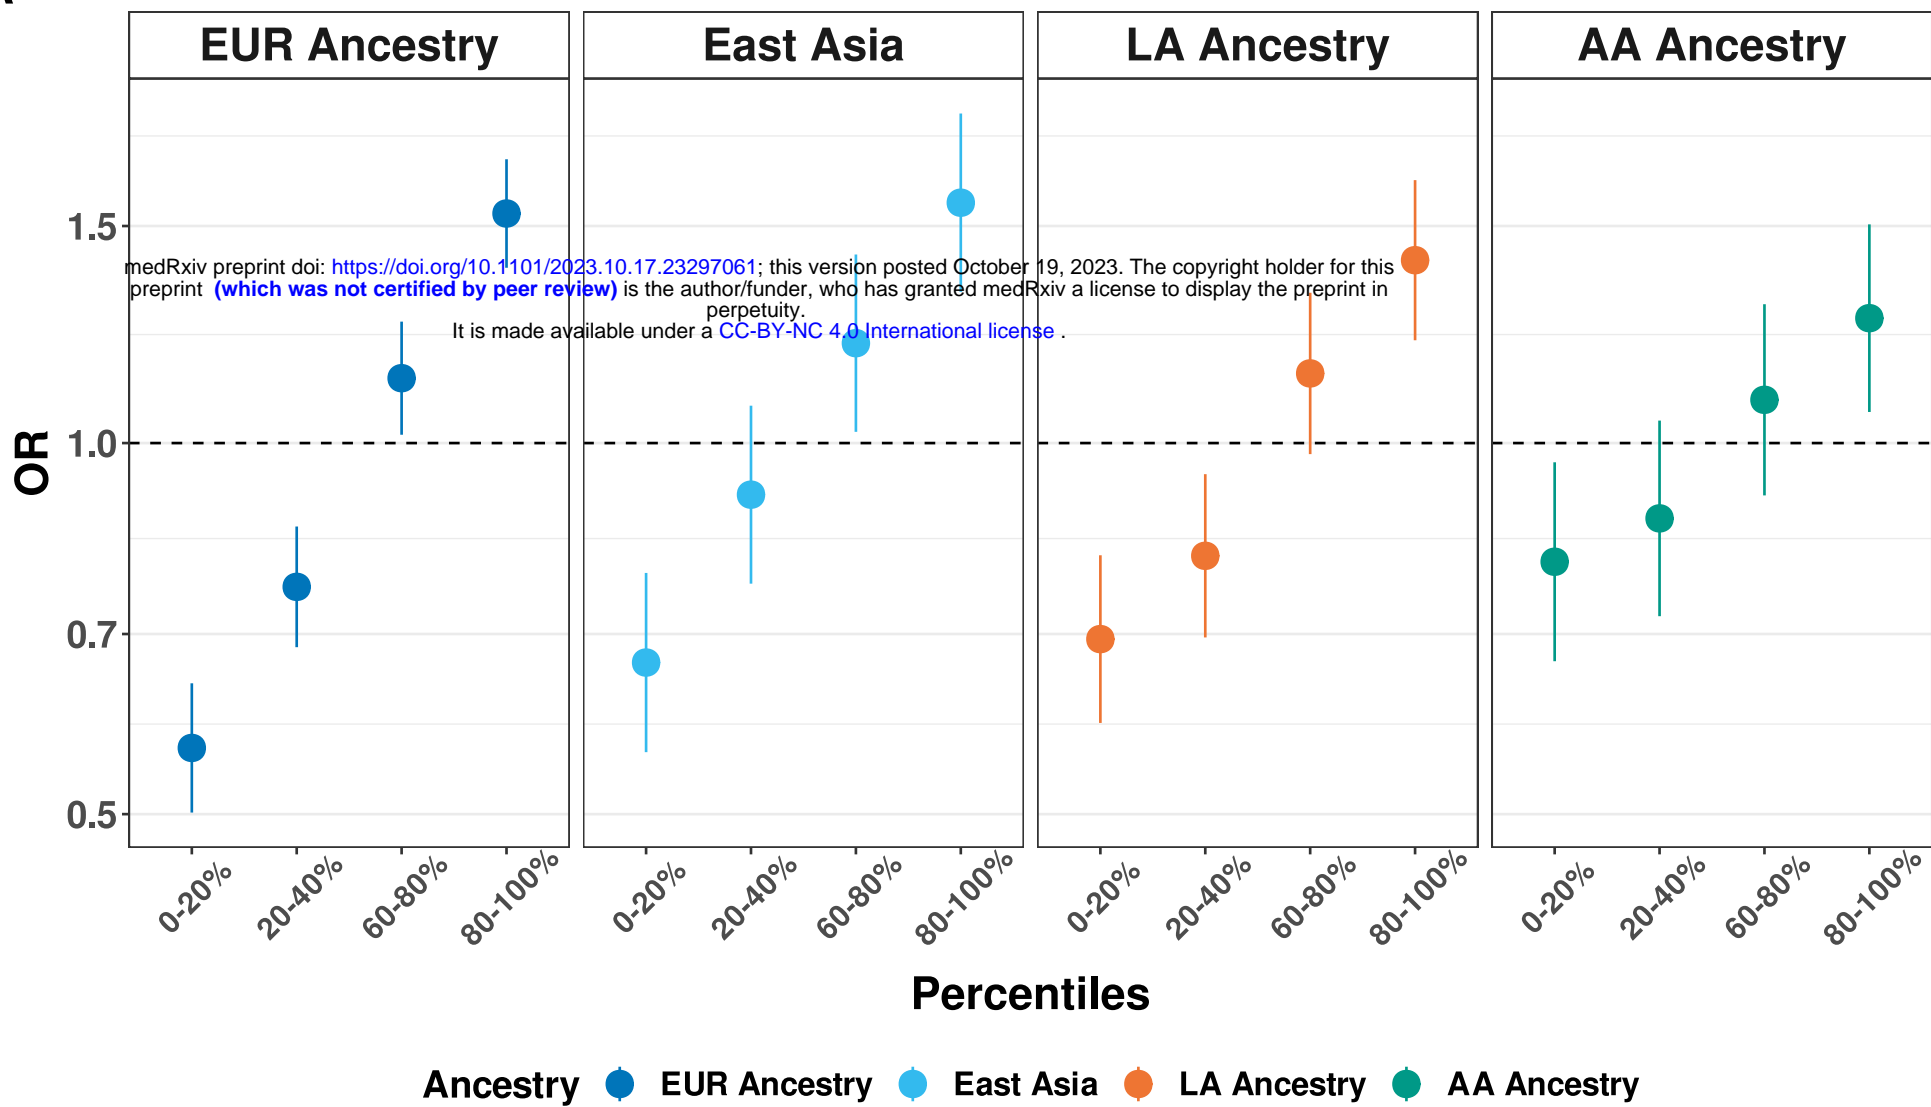**B**GRS<sup>ALZinclAPOE</sup>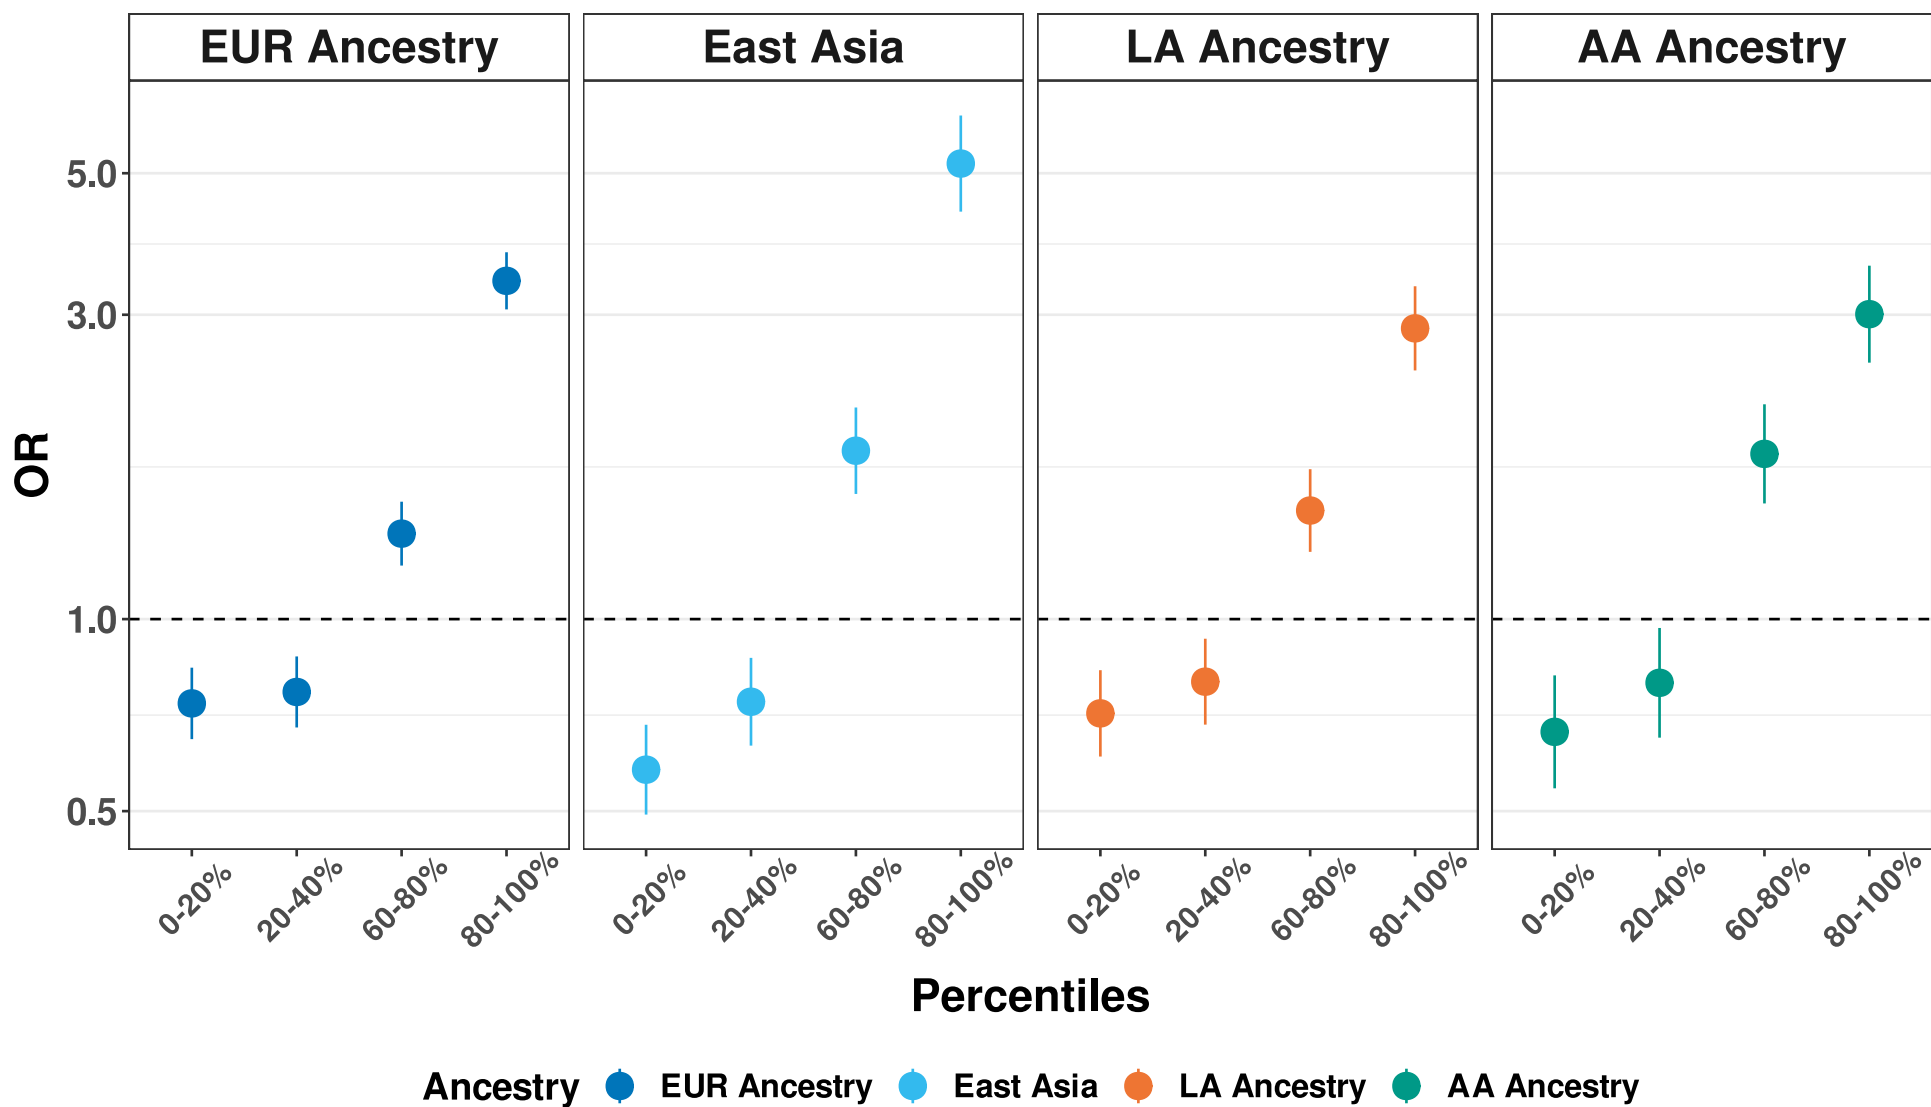

Source: https://medrxiv.org/content/medrxiv/early/2023/10/19/2023.10.17.23297061.full.pdf
